# Supplementary material for: Approaches to the synthesis of a novel, anti-HIV active integrase inhibitor
Source: Royal Society of Chemistry journal article supplement (doi:10.1039/c3ob41728j), 2013-01-01
Supplement: c3ob41728j.pdf [file c3ob41728j.pdf]

## Supplementary Material

### Synthesis of a Novel, anti-HIV Active Integrase Inhibitor

Maurice Okello, Malik Nishonov, Pankaj Singh, Sanjay Mishra, Naveen Mangu,  
Byung Seo, Machhindra Gund, and Vasu Nair\*

*Center for Drug Discovery and College of Pharmacy, University of Georgia,  
Athens, GA 30602, USA*

E-mail: vnair@uga.edu

#### Contents

<sup>1</sup>H and <sup>13</sup>C NMR Spectra.....S2

<sup>1</sup>H and <sup>13</sup>C NMR Spectra of Intermediates **3** (in CDCl<sub>3</sub>), **4** (in CDCl<sub>3</sub>), **5a** (in CDCl<sub>3</sub>),  
**5b** (in CDCl<sub>3</sub>), **6** (in CDCl<sub>3</sub>), **7** (in CDCl<sub>3</sub>), **8** (in CDCl<sub>3</sub> and DMSO-*d*6), **9** (in CDCl<sub>3</sub>),  
**10** (DMSO-*d*6).

<sup>1</sup>H and <sup>13</sup>C NMR Spectra of Target Molecule **1** (in CDCl<sub>3</sub>)

HPLC Chromatogram of Target Molecule **1** and Analysis Table for Purity.....S22

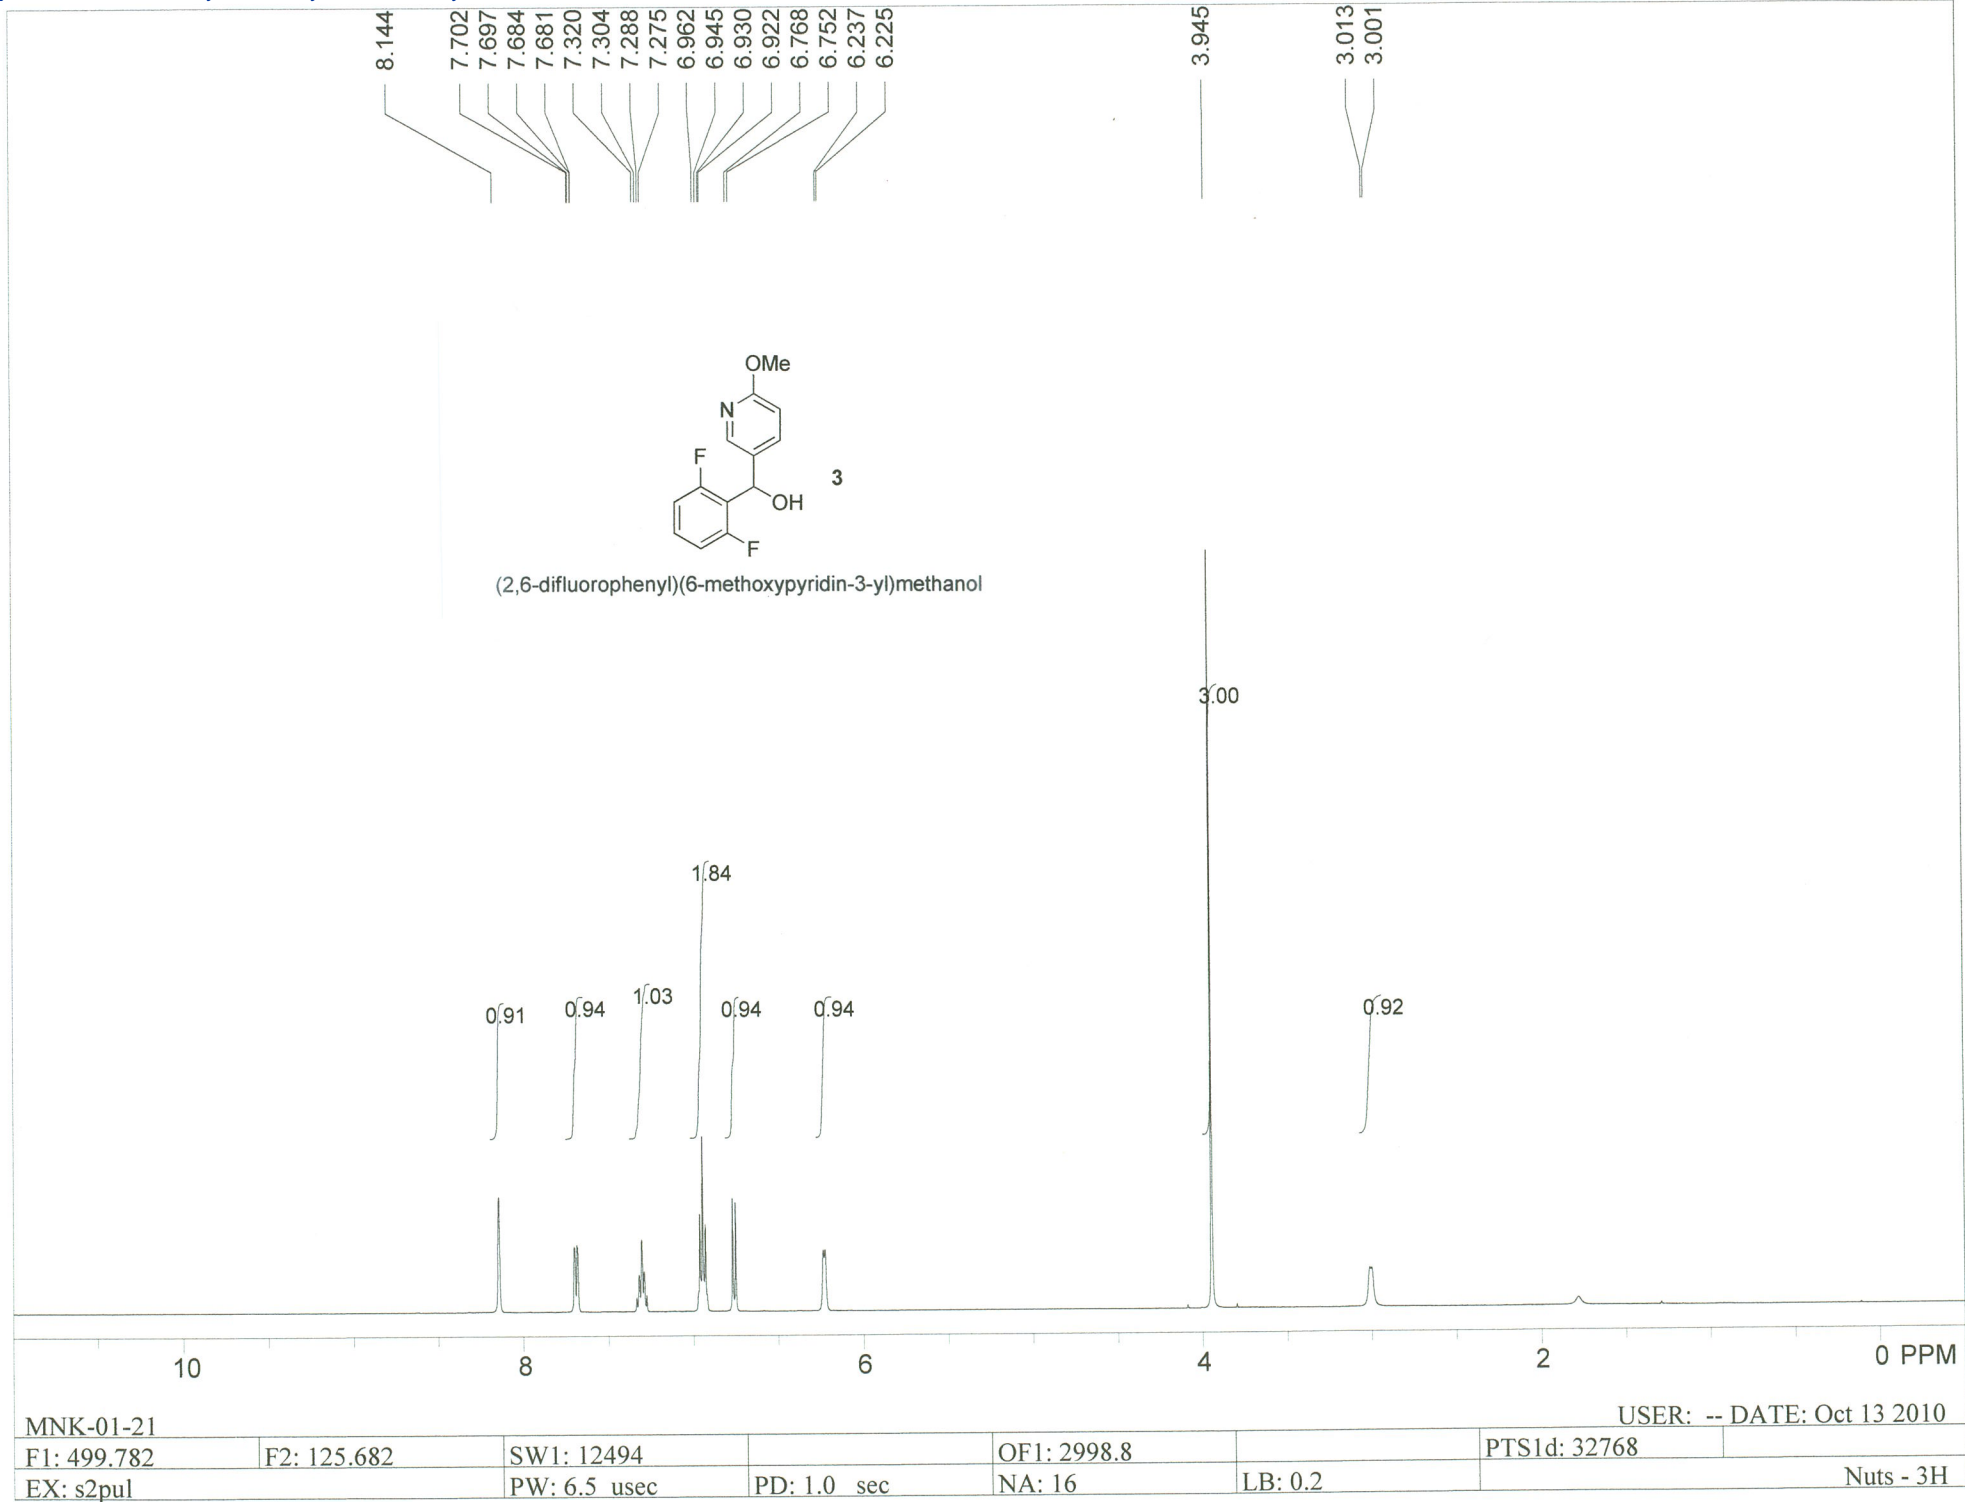

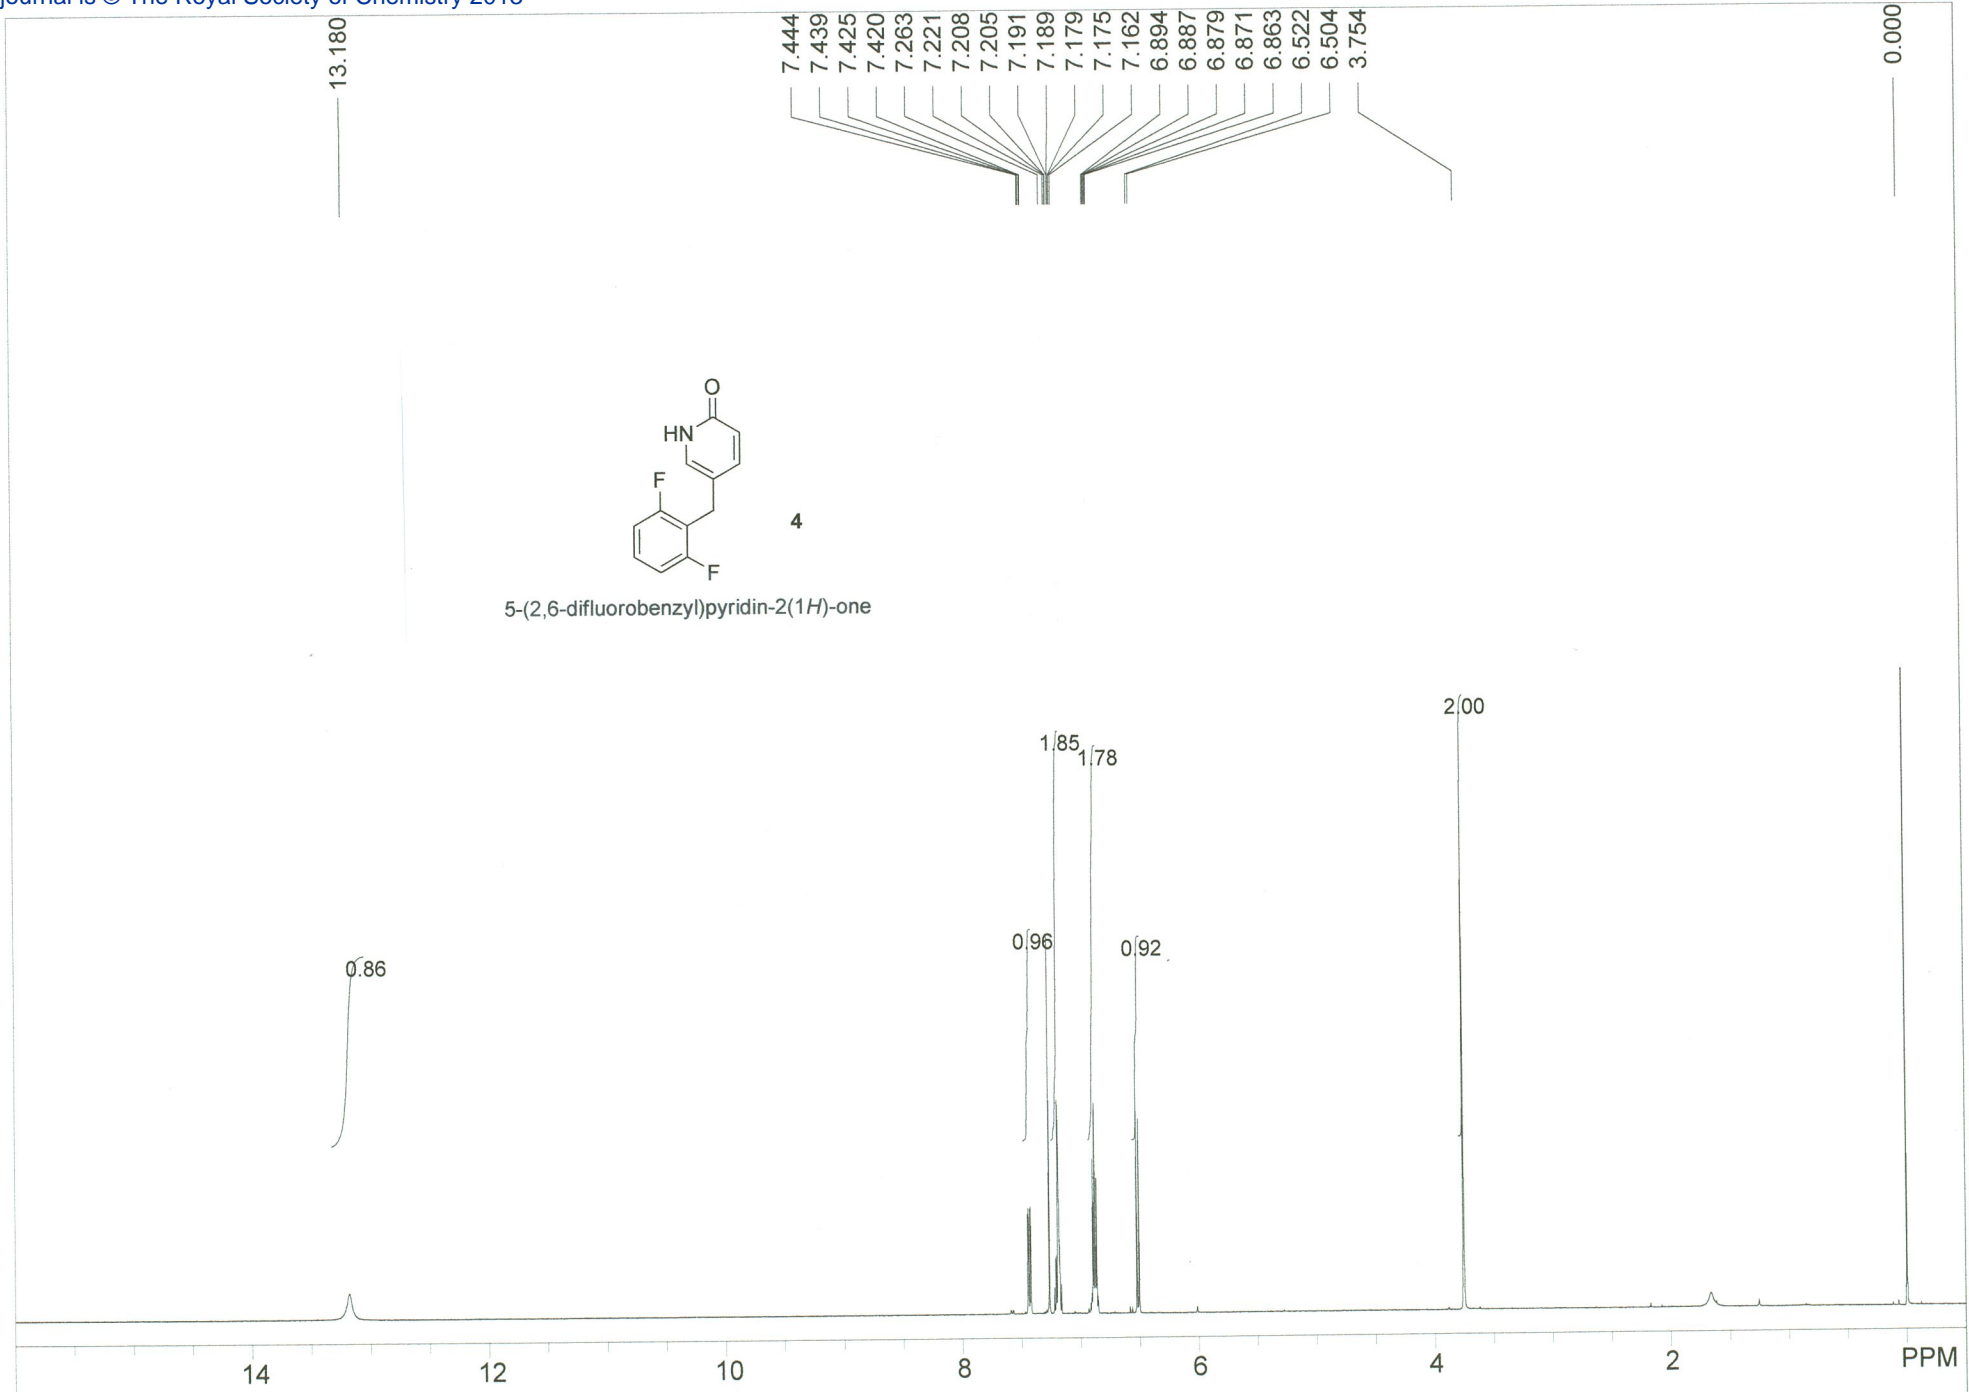

MNK-01-31B

F1: 499.782

F2: 125.682

SW1: 12494

PD: 1.0 sec

OF1: 2980.4

NA: 16

LB: 0.2

PTS1d: 32768

USER: -- DATE: Nov 19 2010

Nuts - 4H

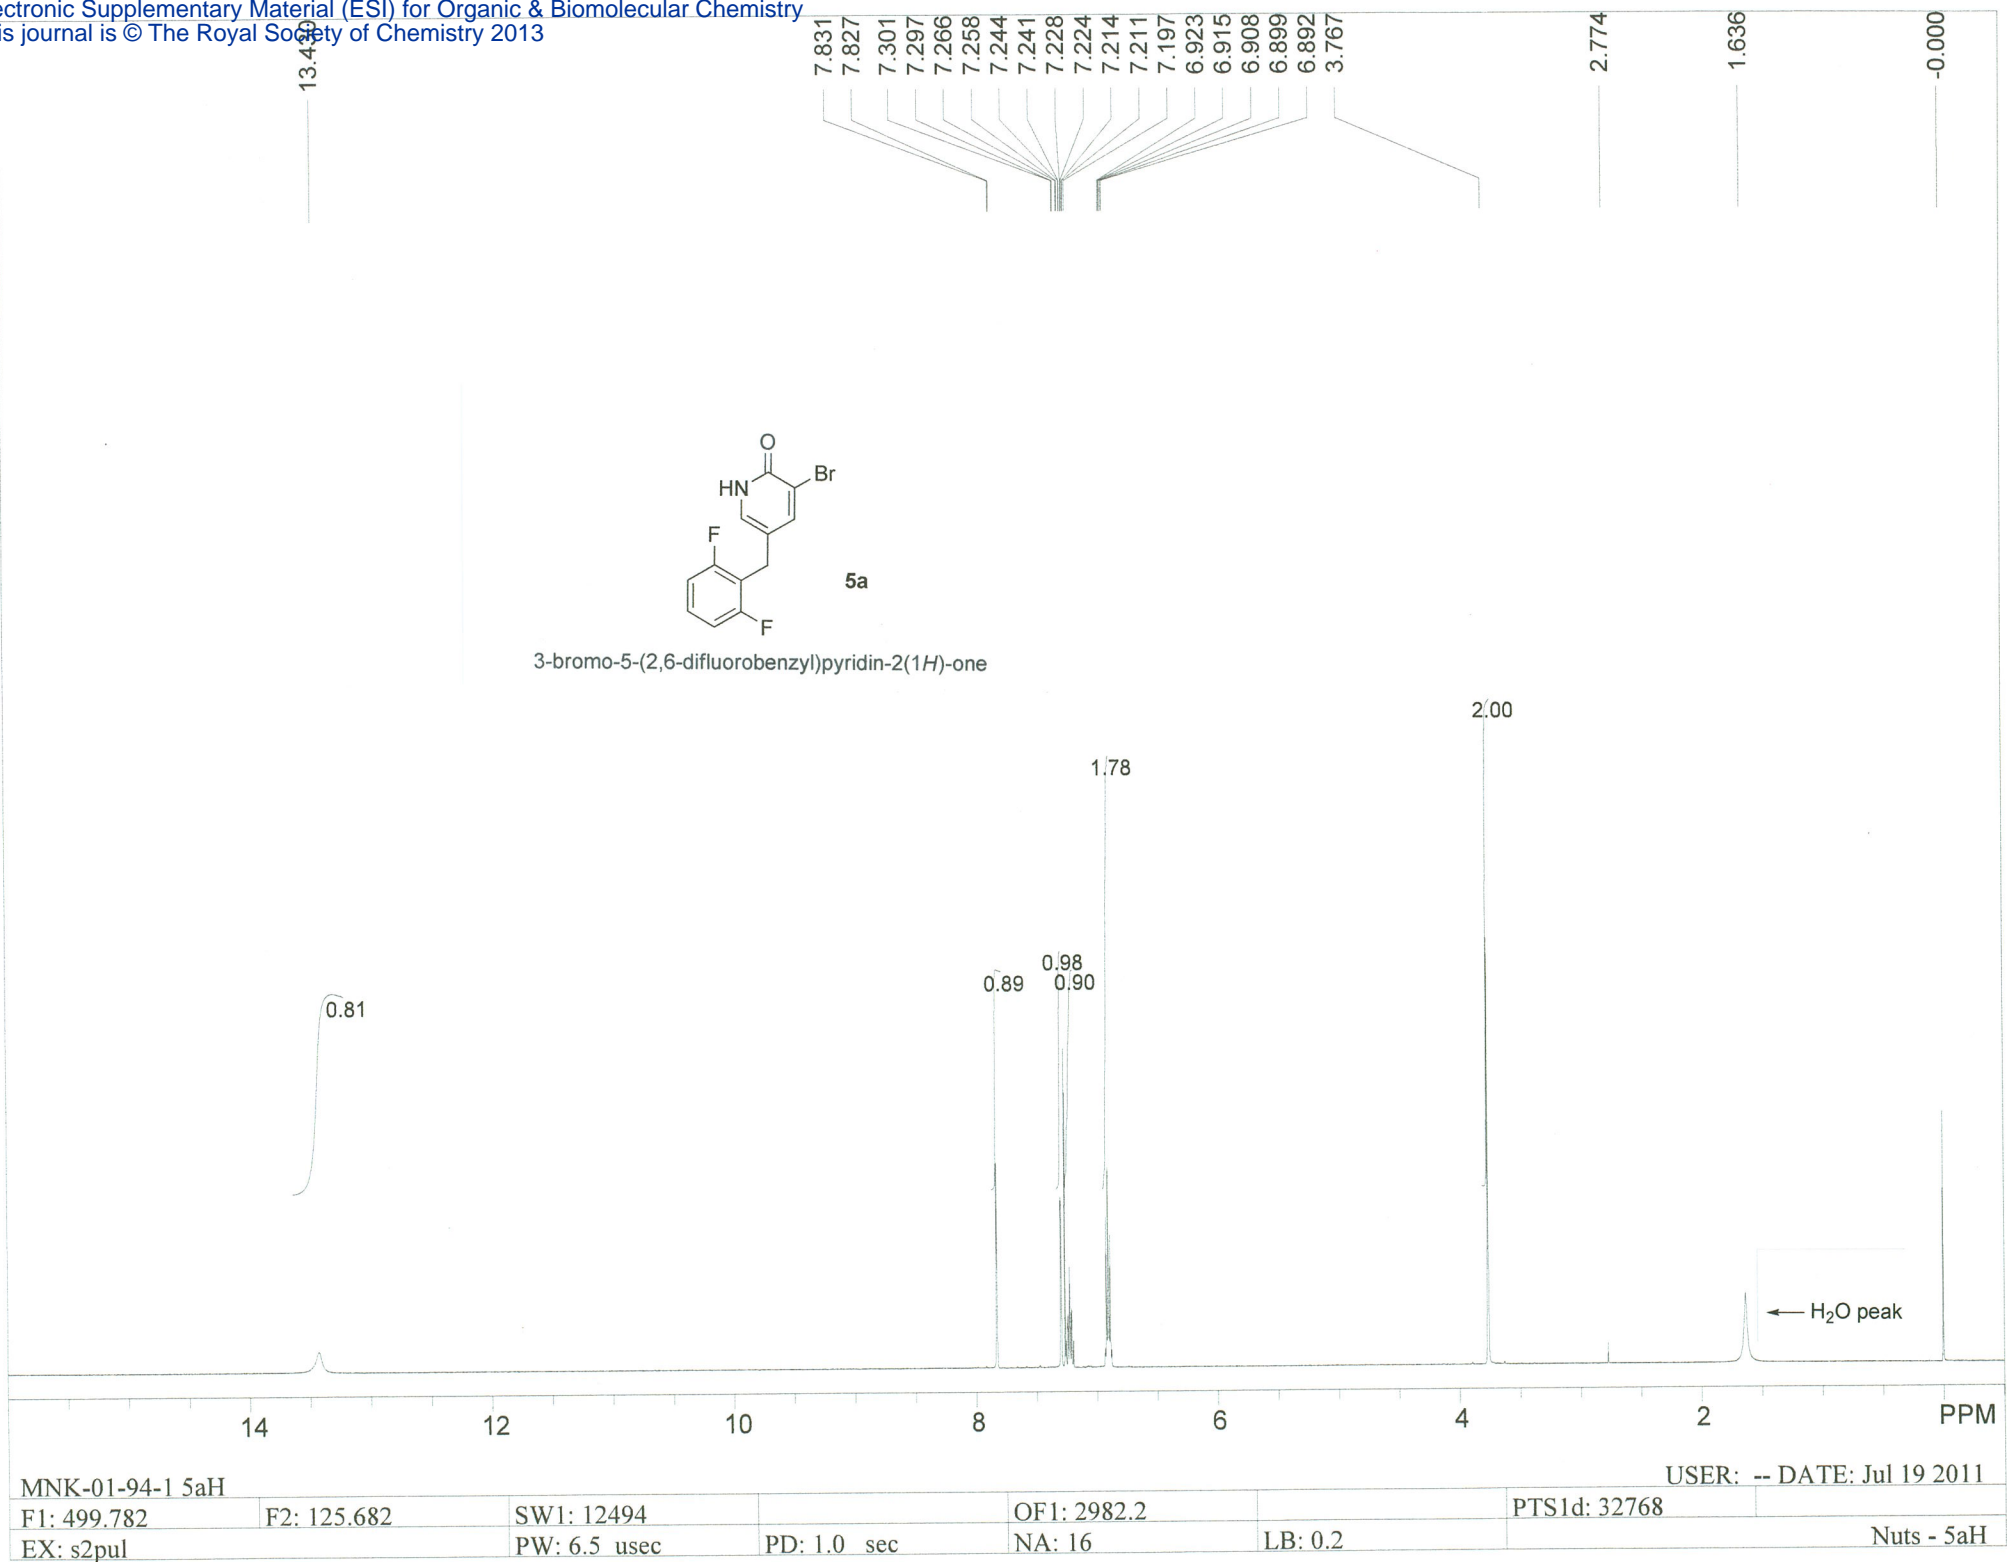

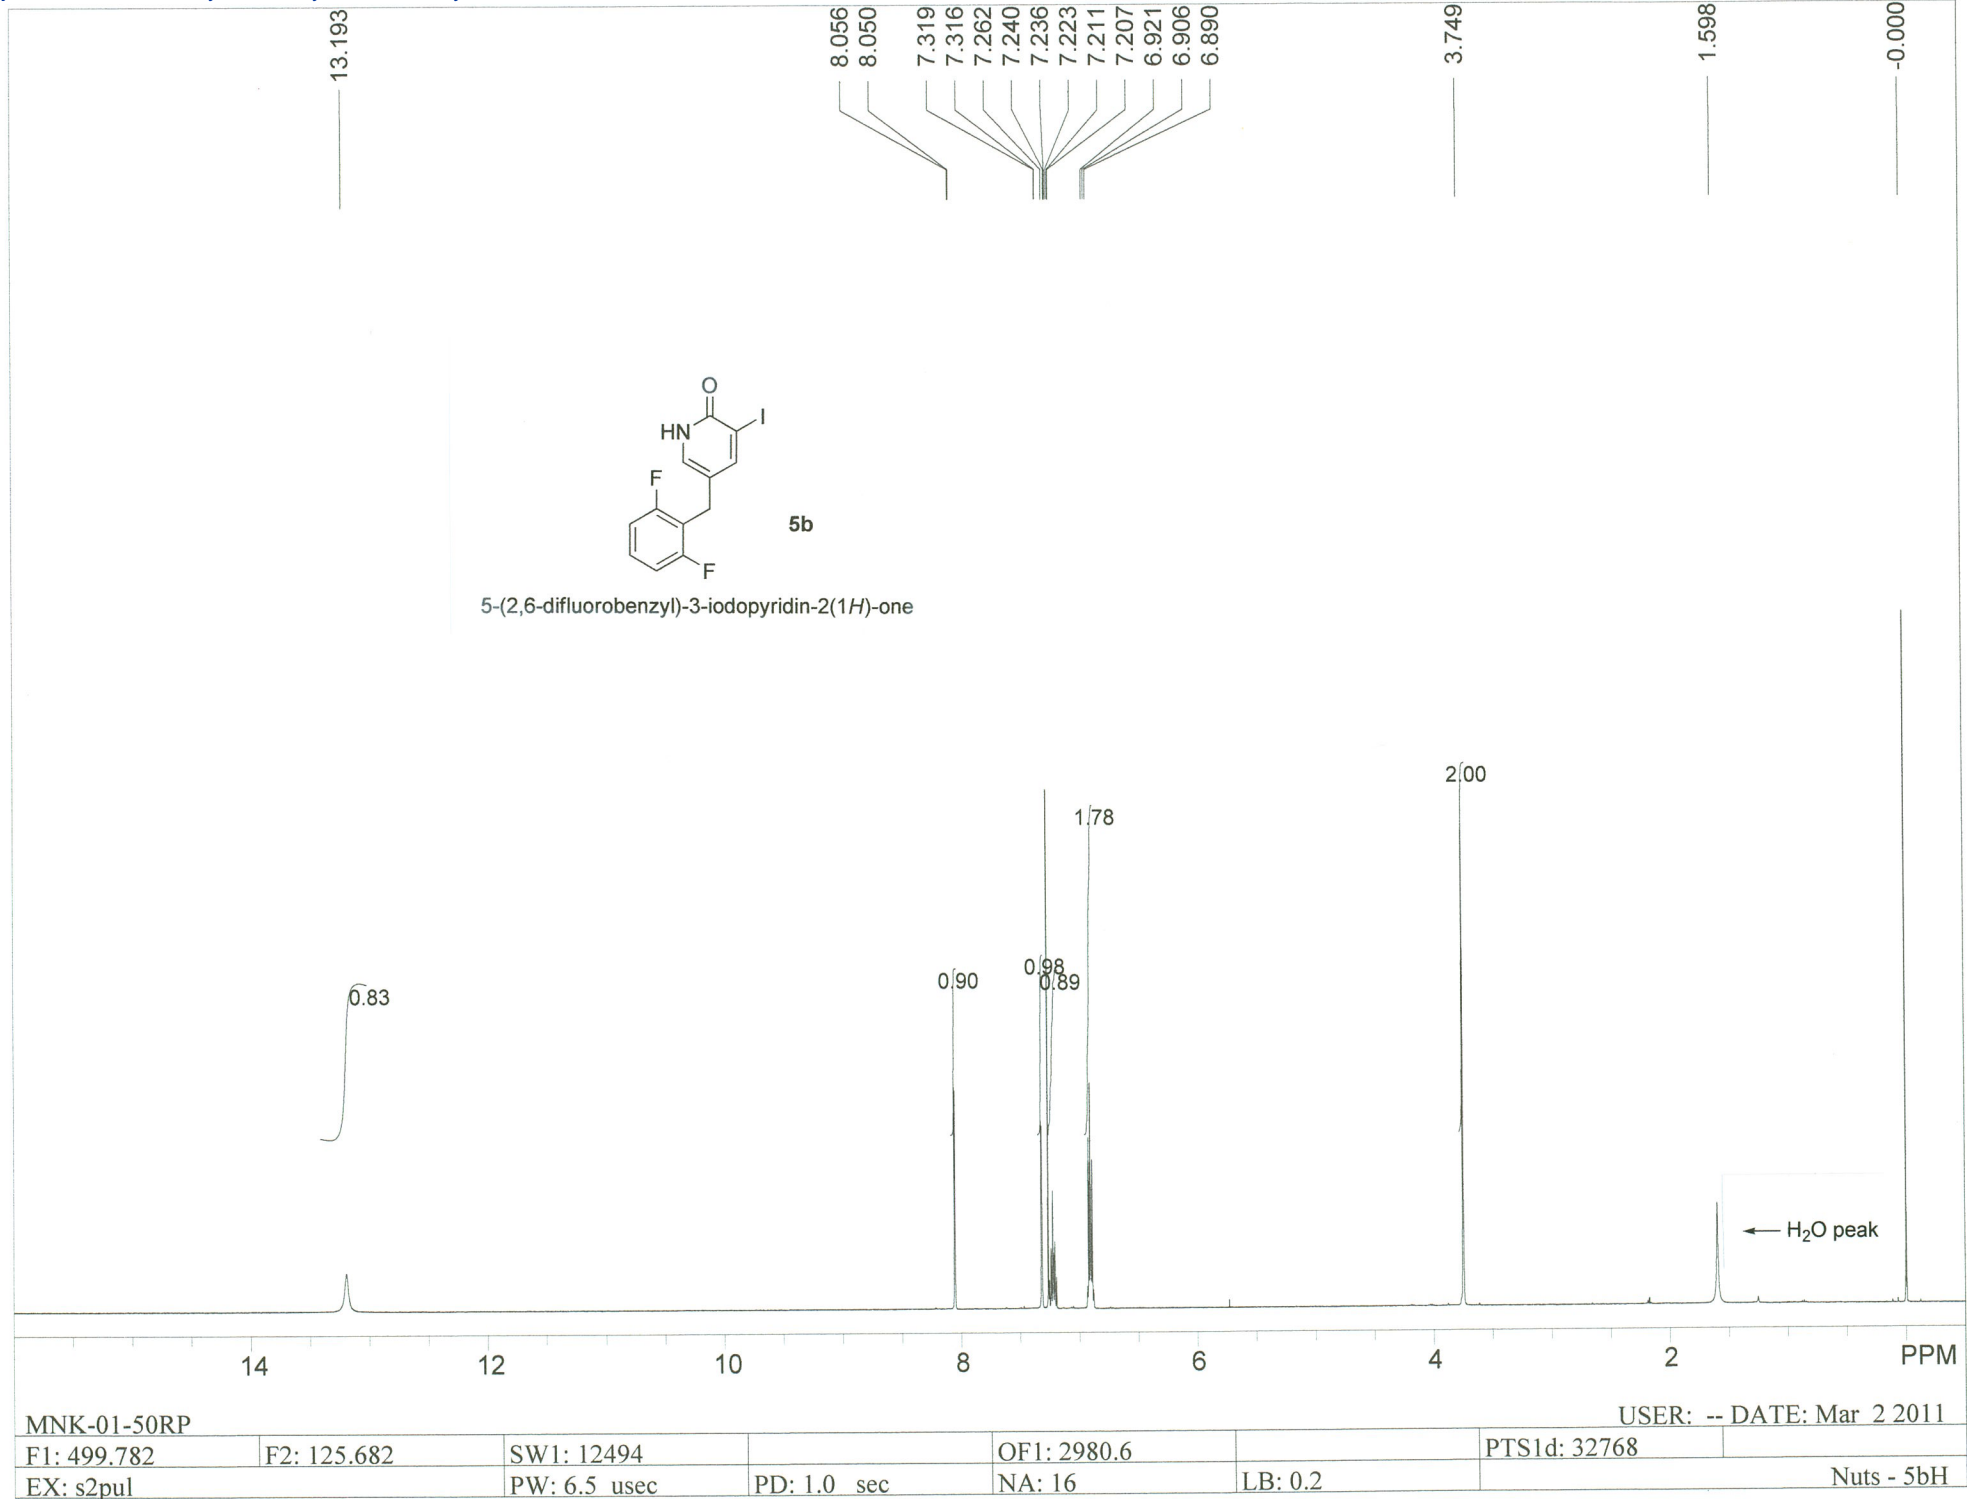

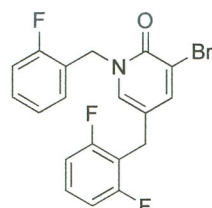

3-bromo-5-(2,6-difluorobenzyl)-1-(2-fluorobenzyl)pyridin-2(1H)-one

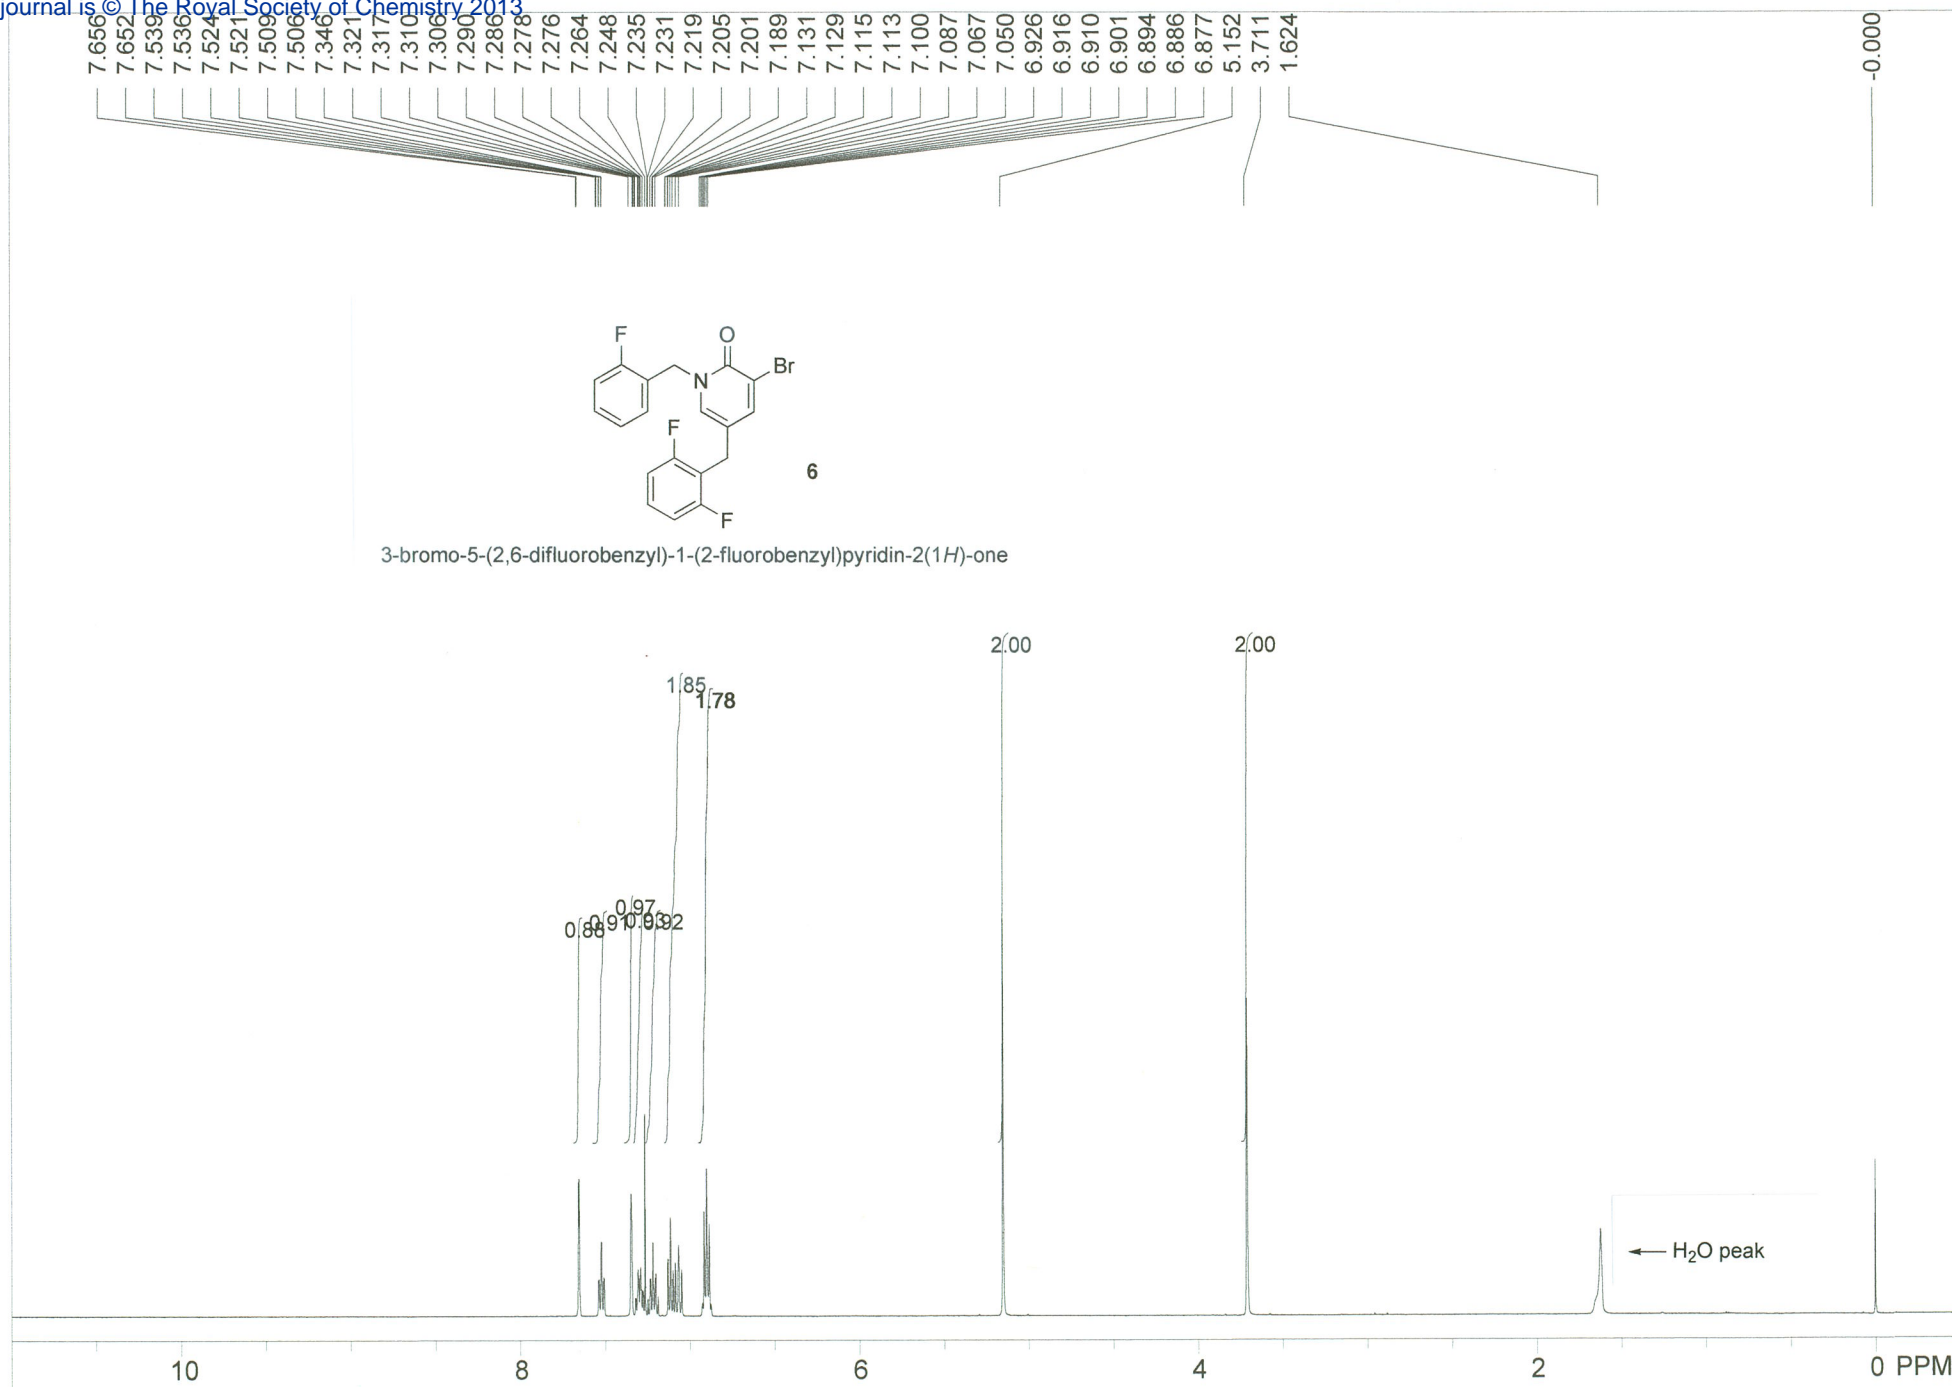

MNK-01-95

USER: -- DATE: Jul 21 2011

F1: 499.782

F2: 125.682

SW1: 12494

OF1: 2981.4

PTS1d: 32768

EX: s2pul

PW: 6.5 usec

PD: 1.0 sec

NA: 16

LB: 0.2

Nuts - 6H

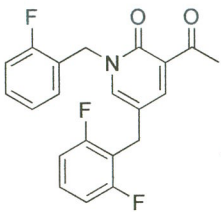

3-acetyl-5-(2,6-difluorobenzyl)-1-(2-fluorobenzyl)pyridin-2(1*H*)-one

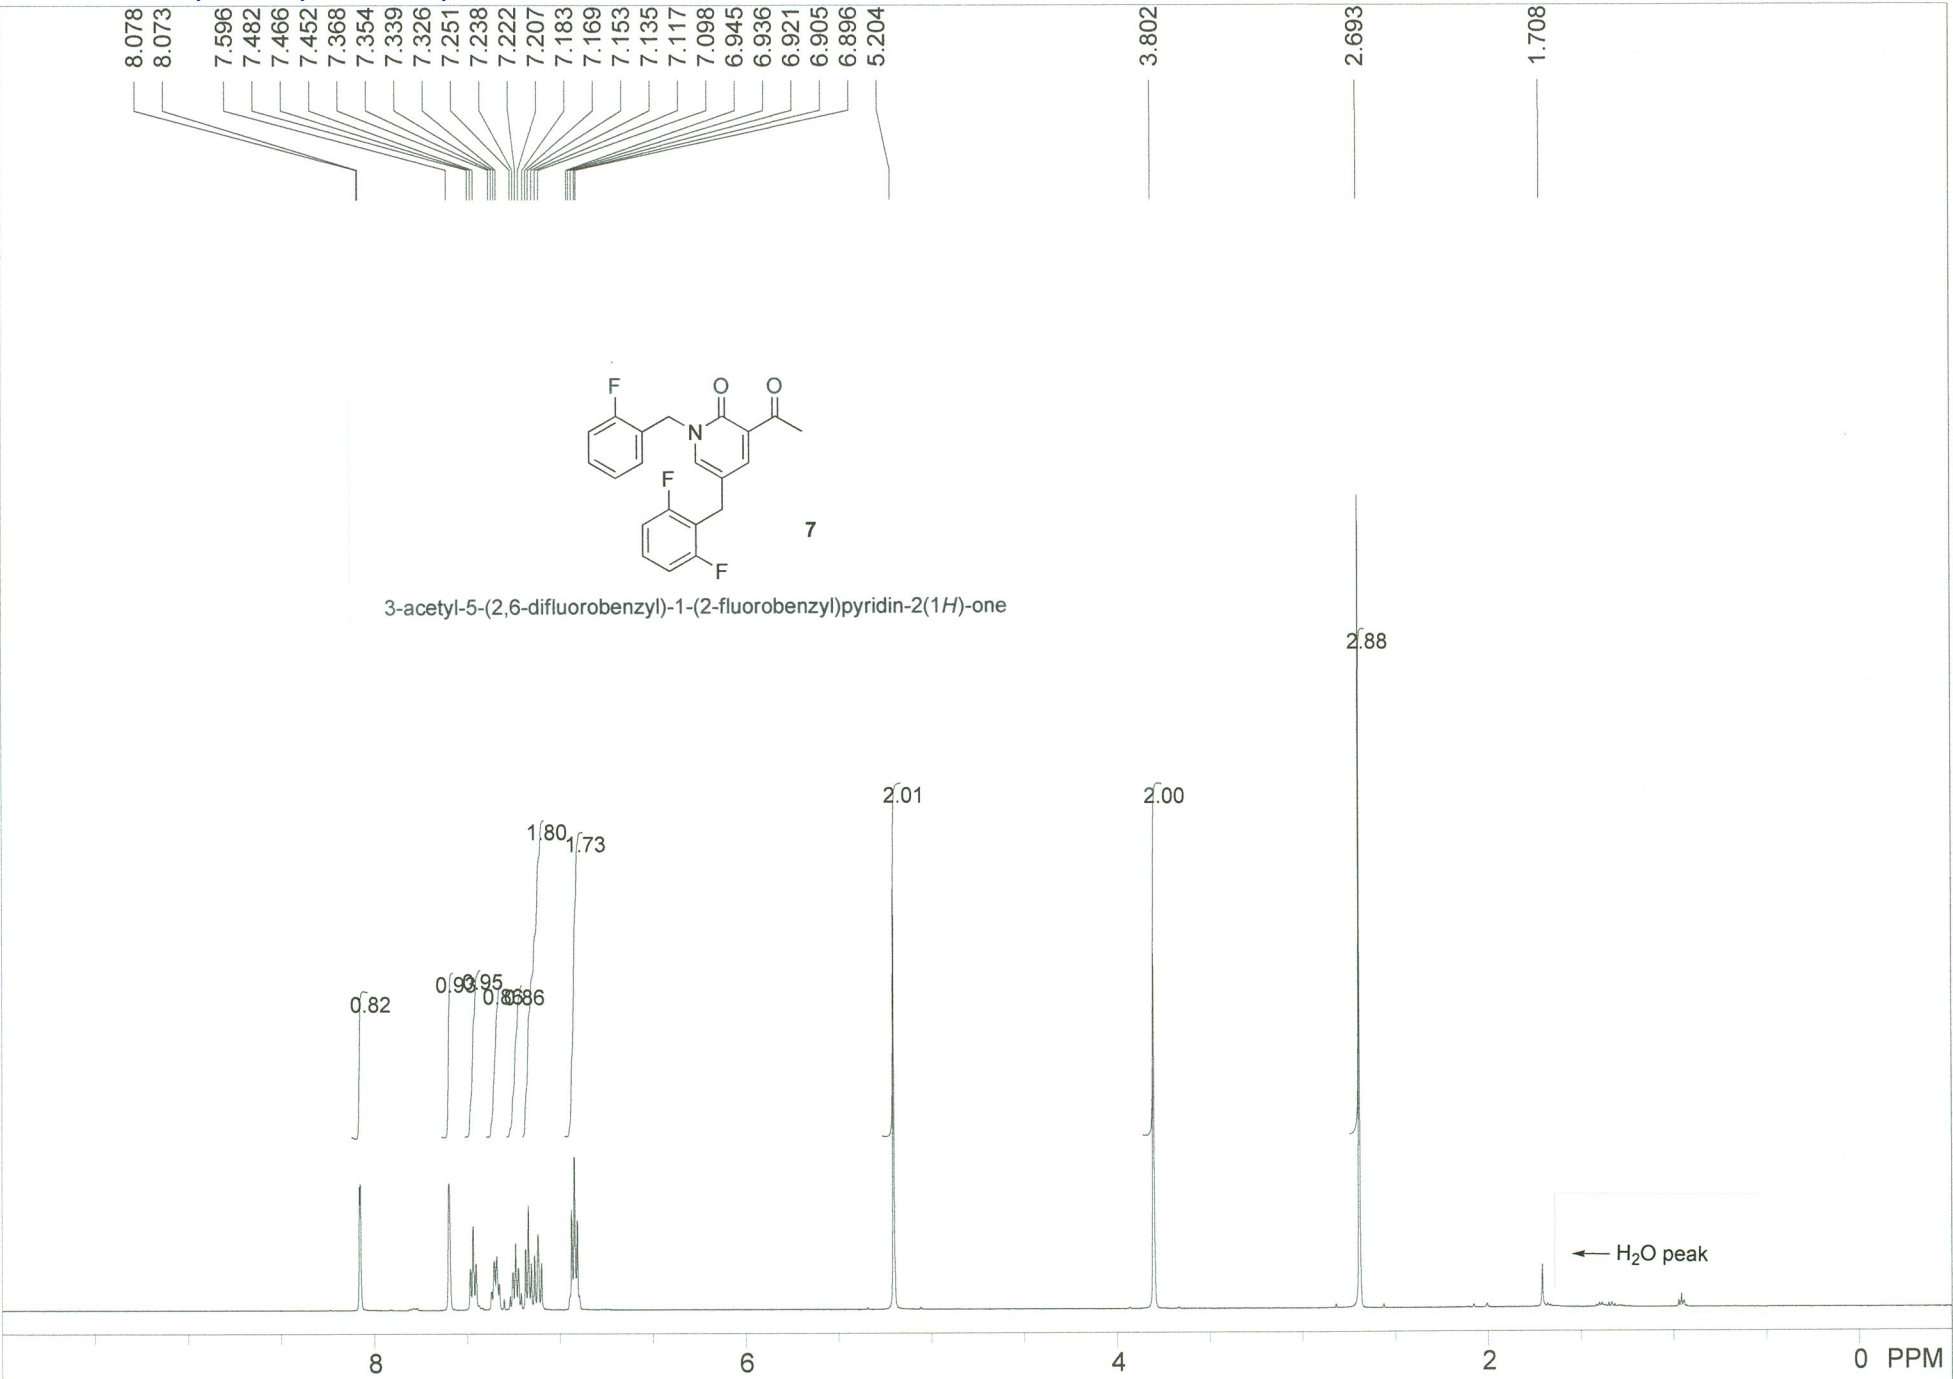

MAN\_VI\_22H

USER: -- DATE: Apr 8 2010

F1: 499.782

F2: 125.682

SW1: 7997

OF1: 2998.8

PTS1d: 16384

EX: s2pul

PW: 6.5 usec

PD: 1.0 sec

NA: 8

LB: 0.2

Nuts - 7malikH



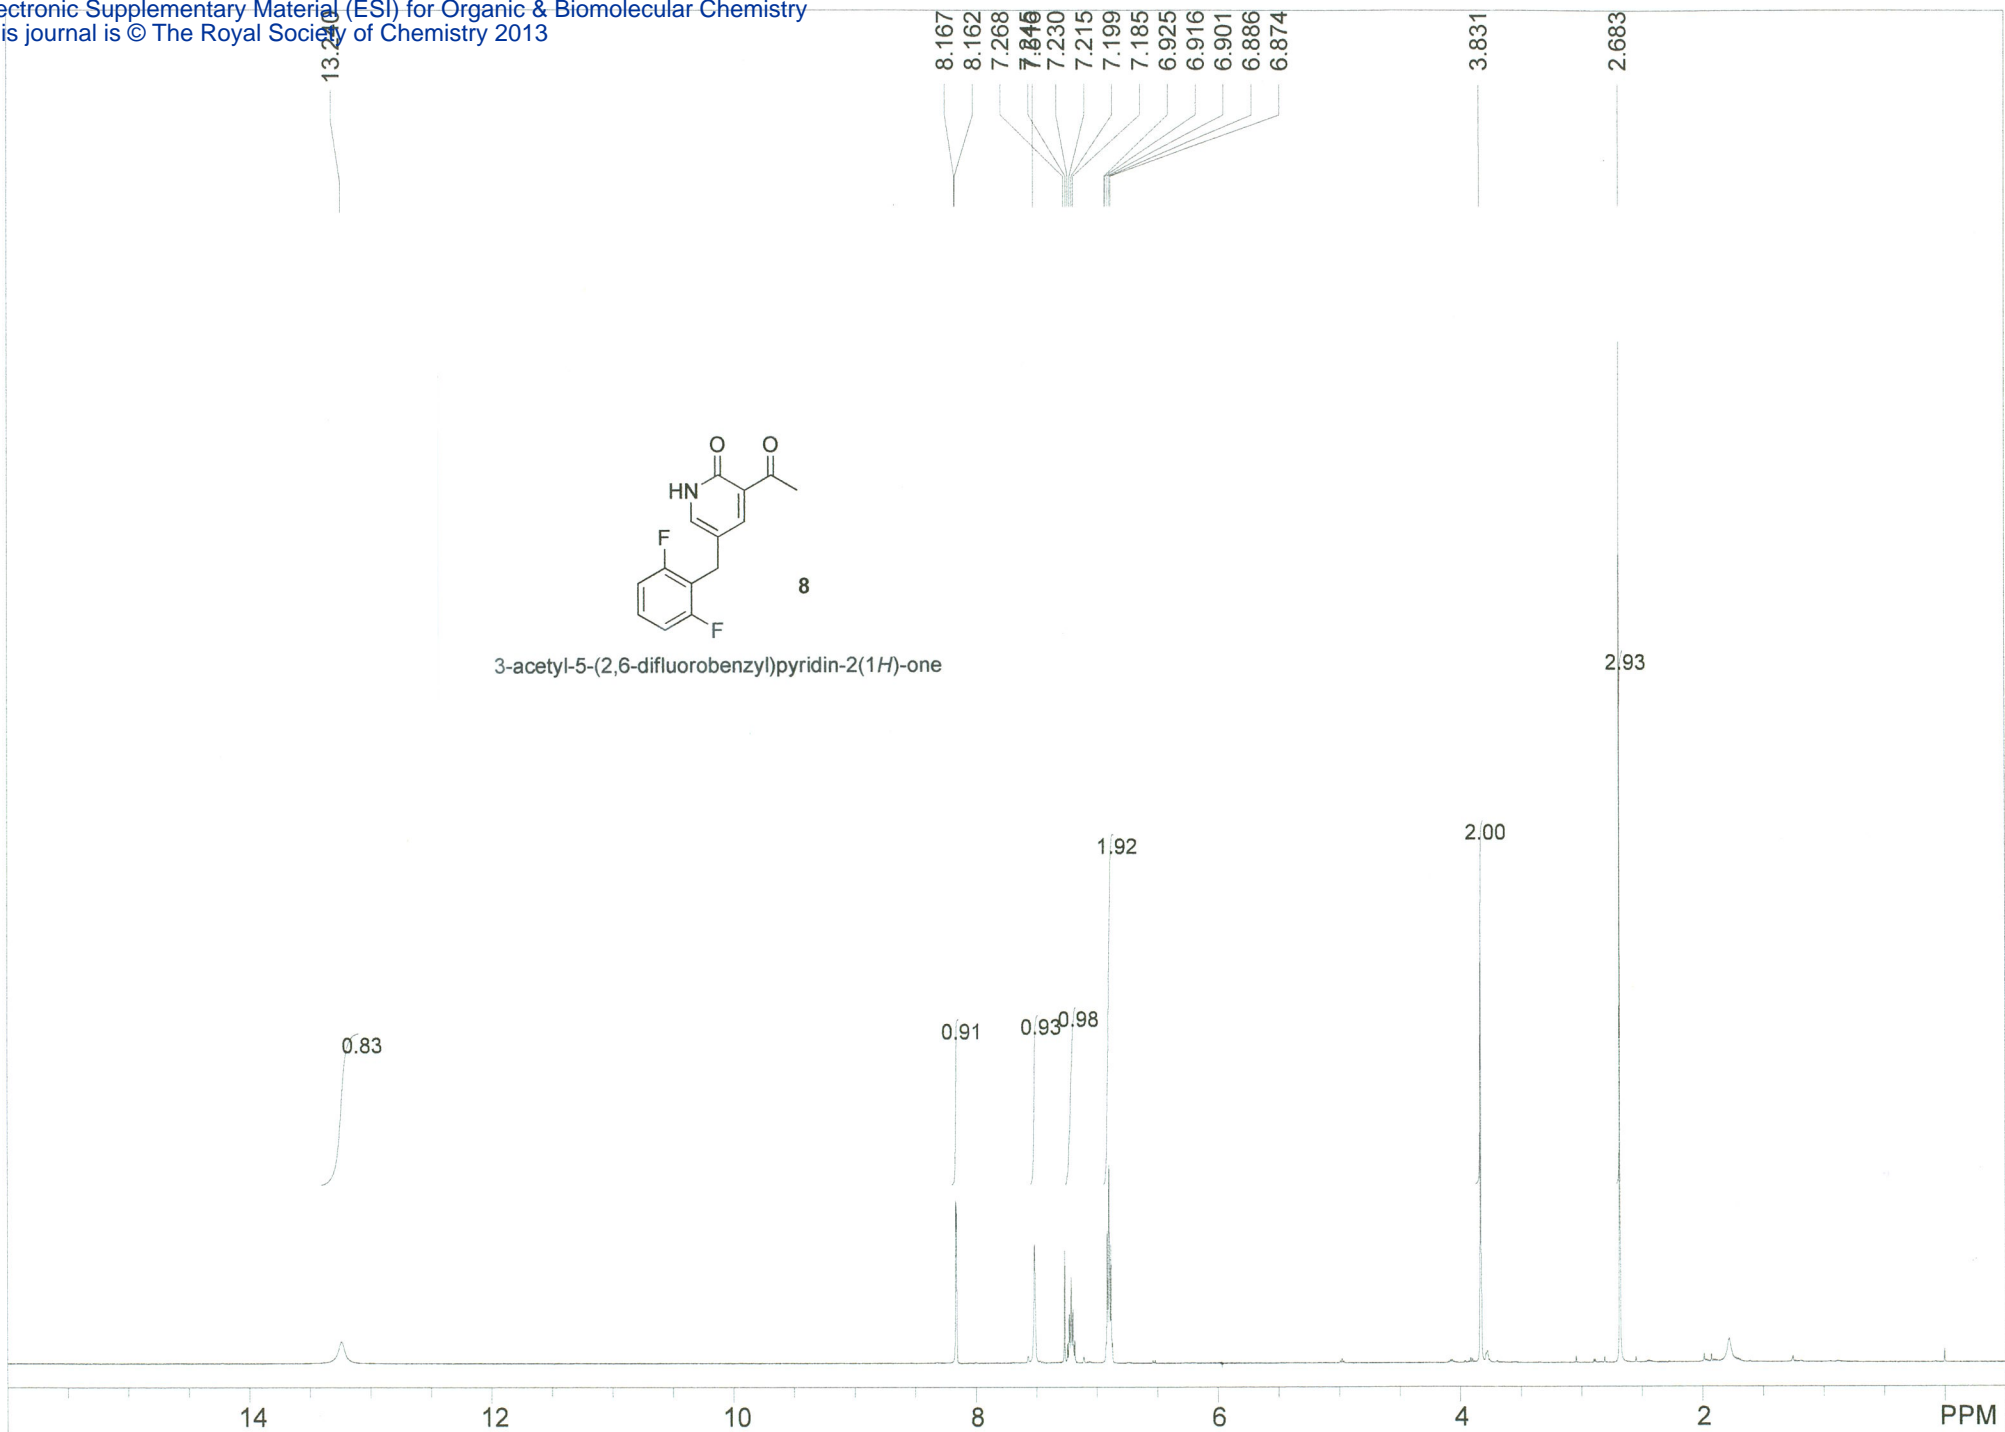

MNK-01-133 8HCDCl<sub>3</sub>

USER: -- DATE: Apr 4 2012

F1: 499.782

F2: 125.682

SW1: 12494

OF1: 2982.9

PTS1d: 32768

EX: s2pul

PW: 6.5 usec

PD: 1.0 sec

NA: 16

LB: 0.2

Nuts - 8HCDCl<sub>3</sub>



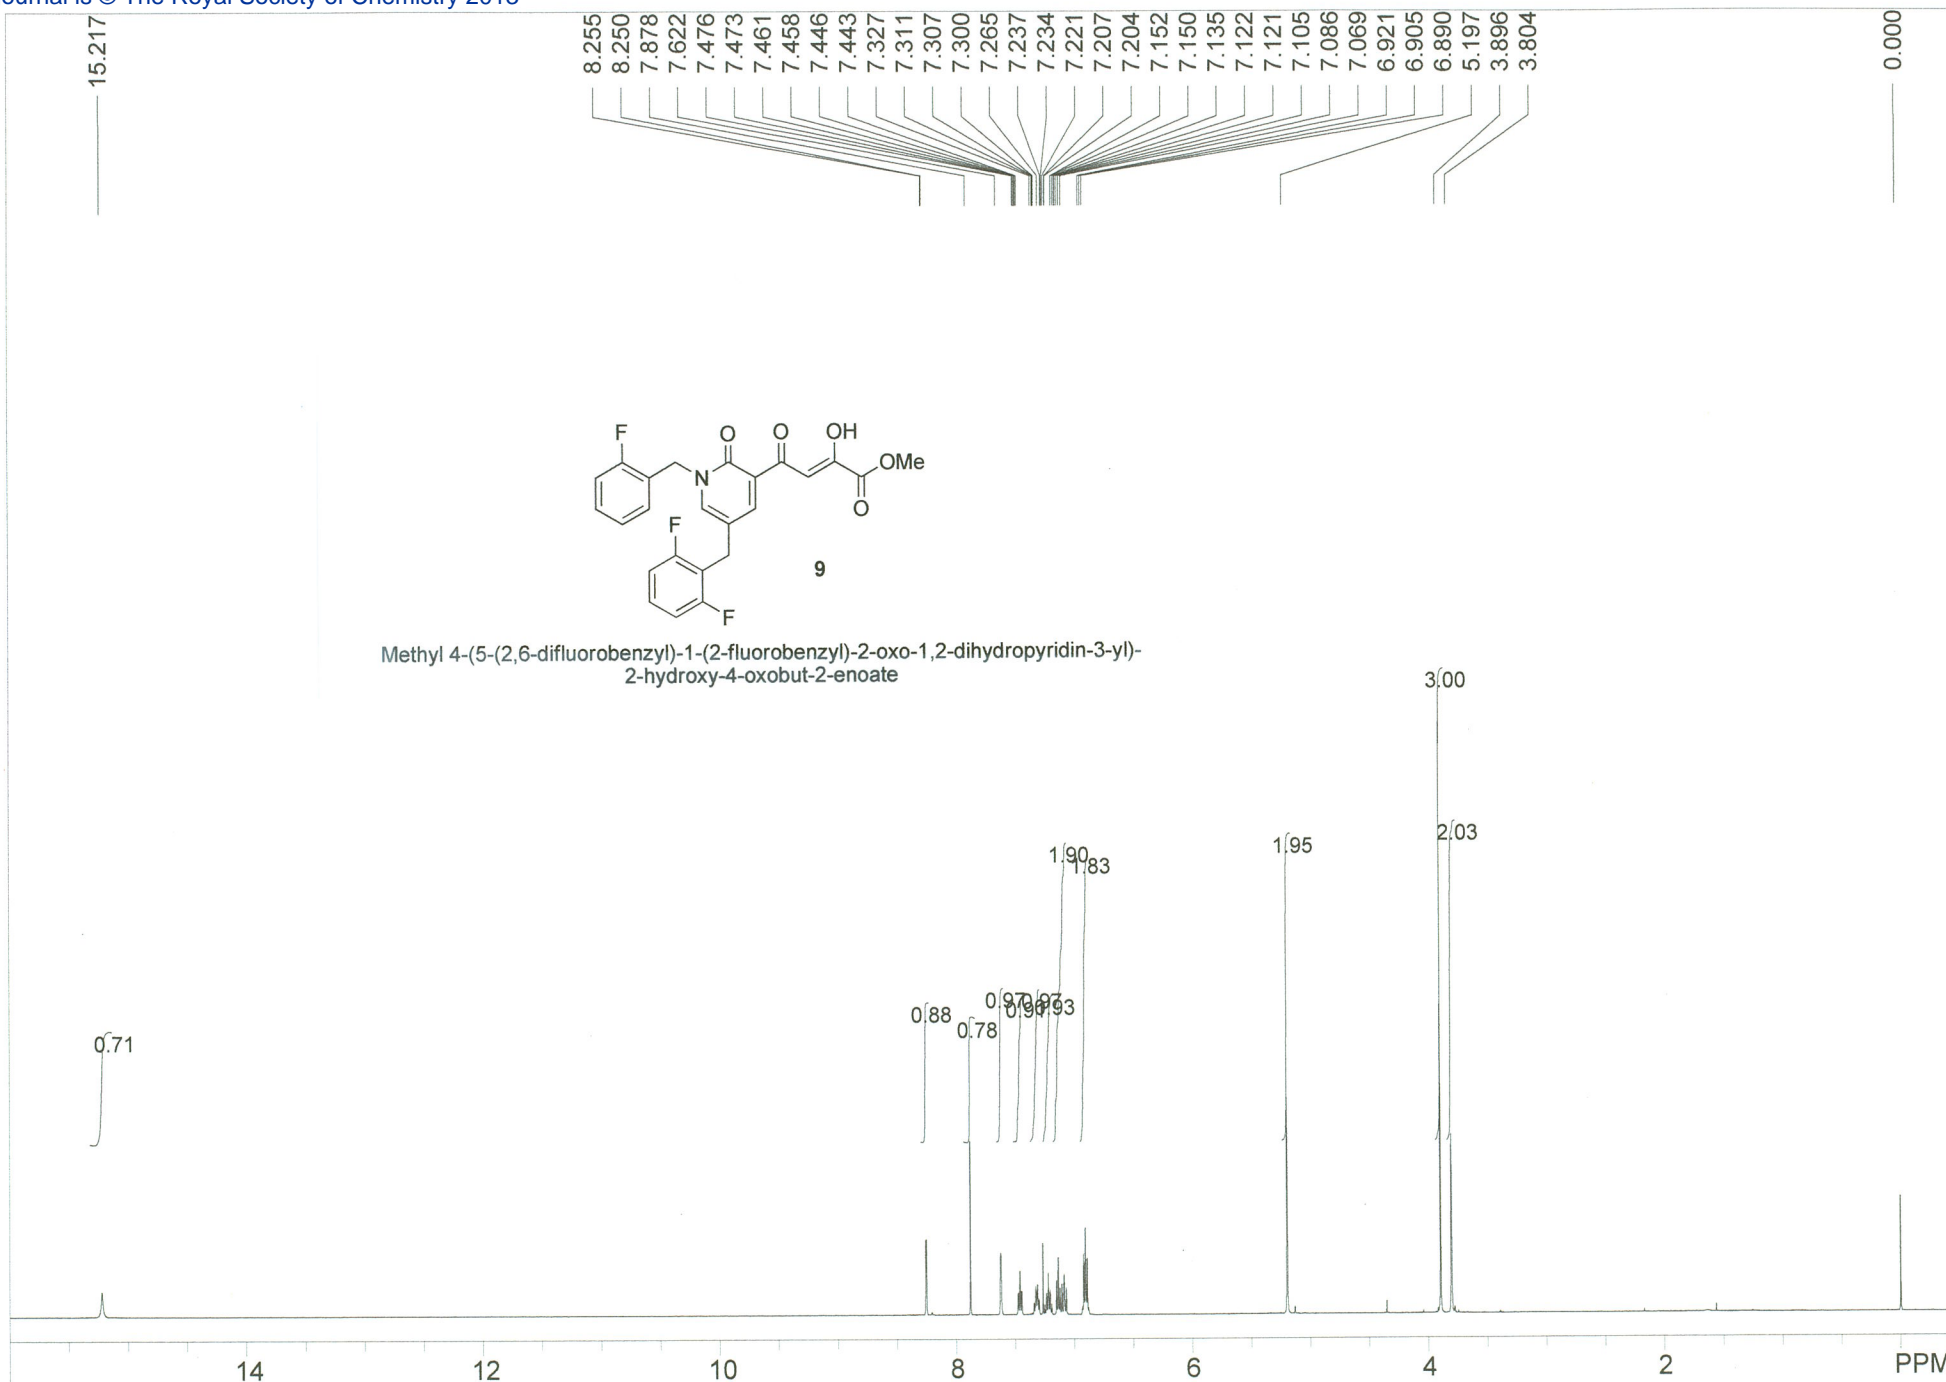

MeStr 2F26diF

USER: -- DATE: Jan 24 2011

F1: 499.782

F2: 125.682

SW1: 12494

OF1: 2981.1

PTS1d: 32768

EX: s2pul

PW: 6.5 usec

PD: 1.0 sec

NA: 16

LB: 0.2

Nuts - 9H

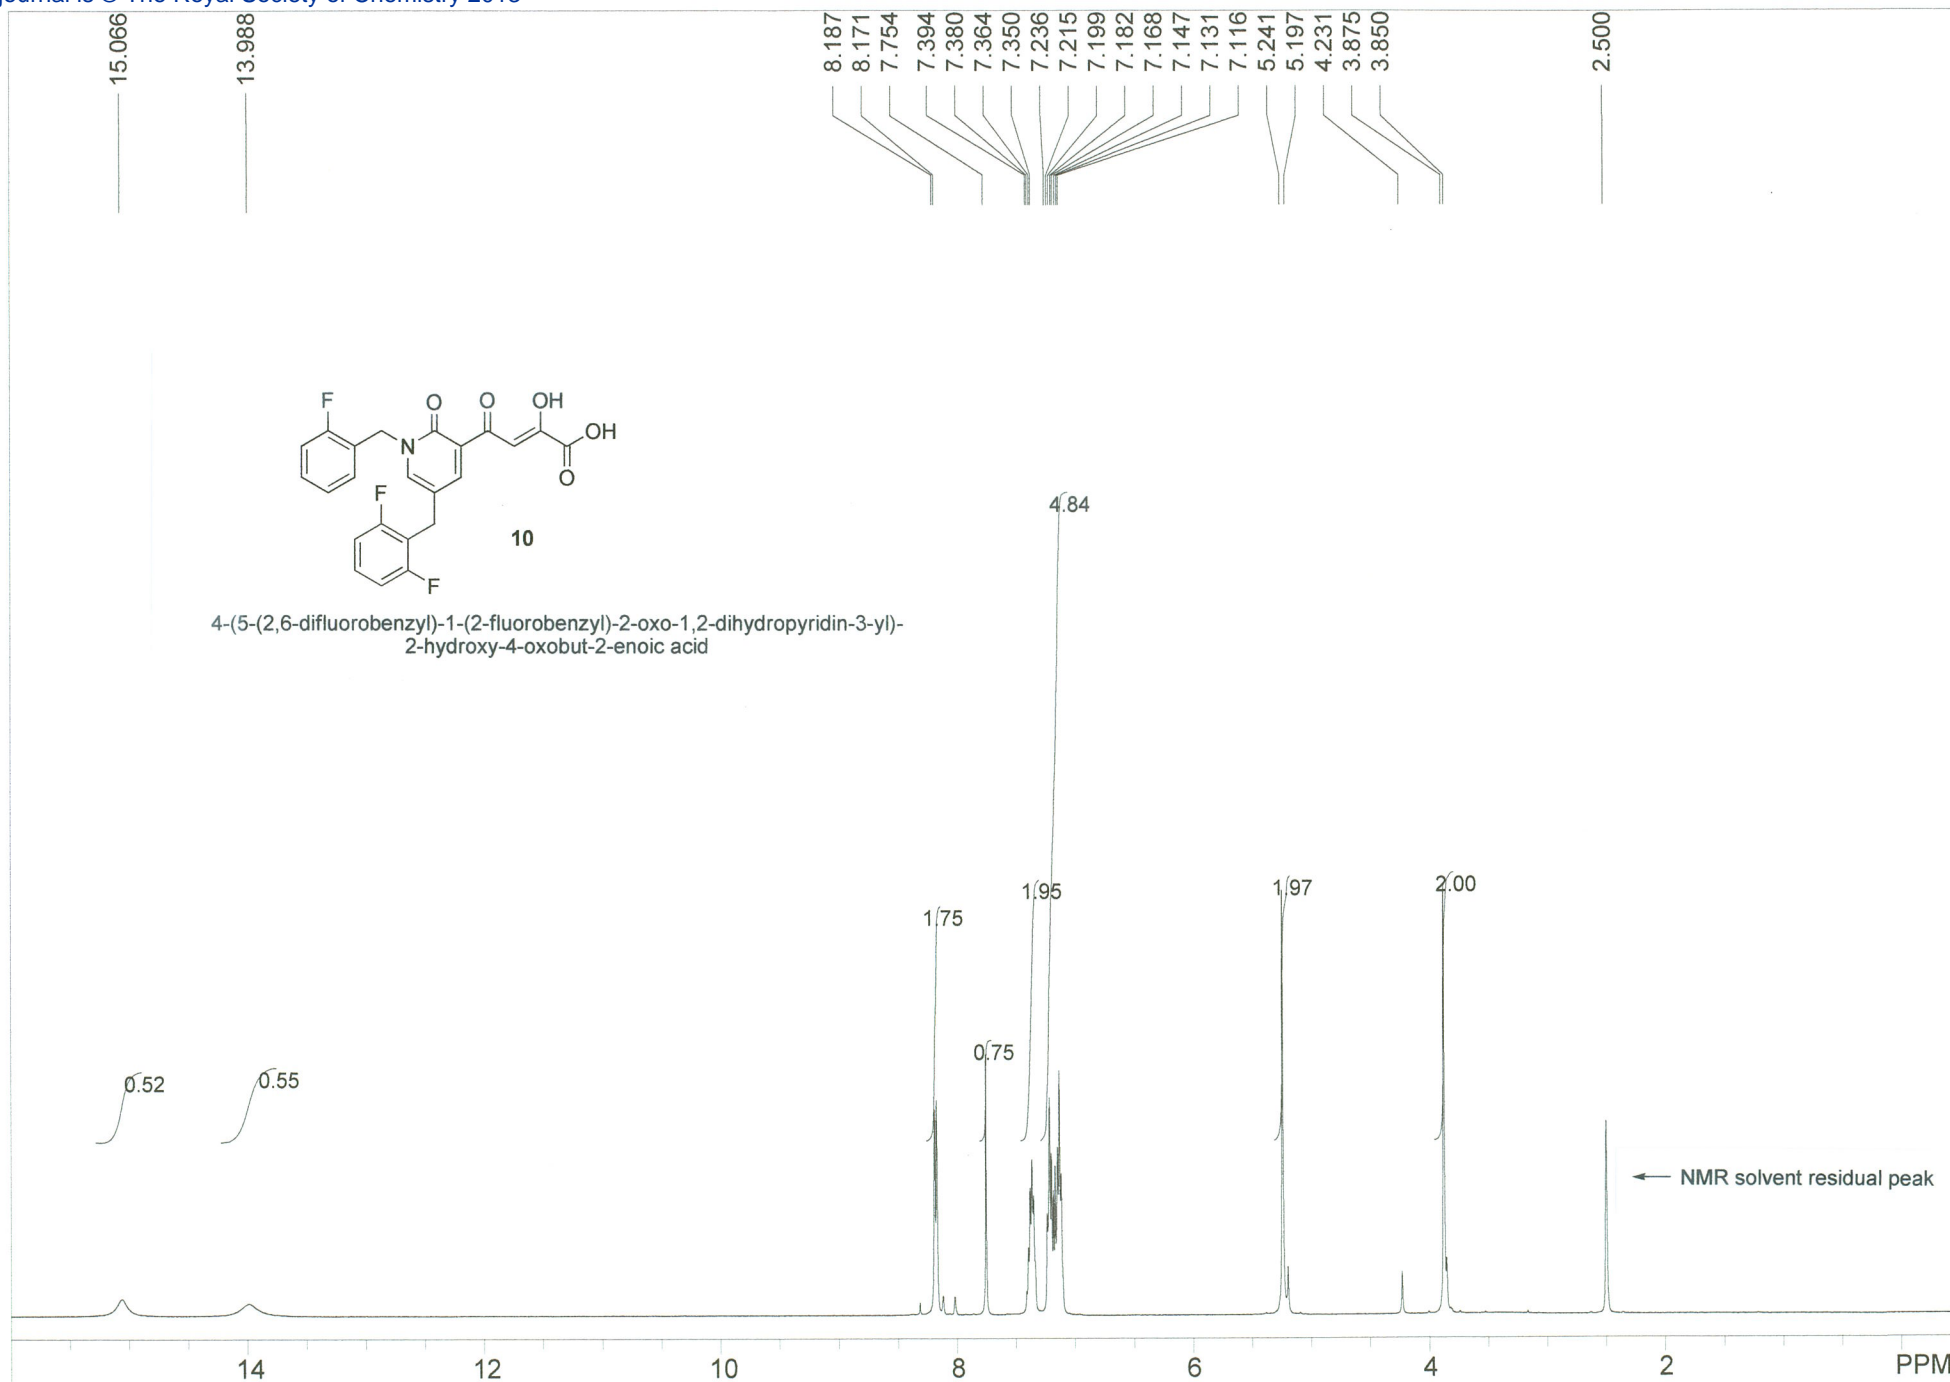

MNK-01-40-wash2

USER: -- DATE: Jan 24 2011

F1: 499.785

F2: 125.682

SW1: 12494

OF1: 2984.9

PTS1d: 32768

EX: s2pul

PW: 6.5 usec

PD: 1.0 sec

NA: 16

LB: 0.2

Nuts - 10H

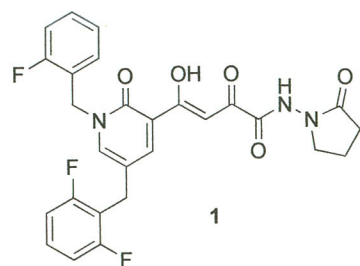

1  
4-(5-(2,6-difluorobenzyl)-1-(2-fluorobenzyl)-2-oxo-1,2-dihydropyridin-3-yl)-  
4-hydroxy-2-oxo-N-(2-oxopyrrolidin-1-yl)but-3-enamide

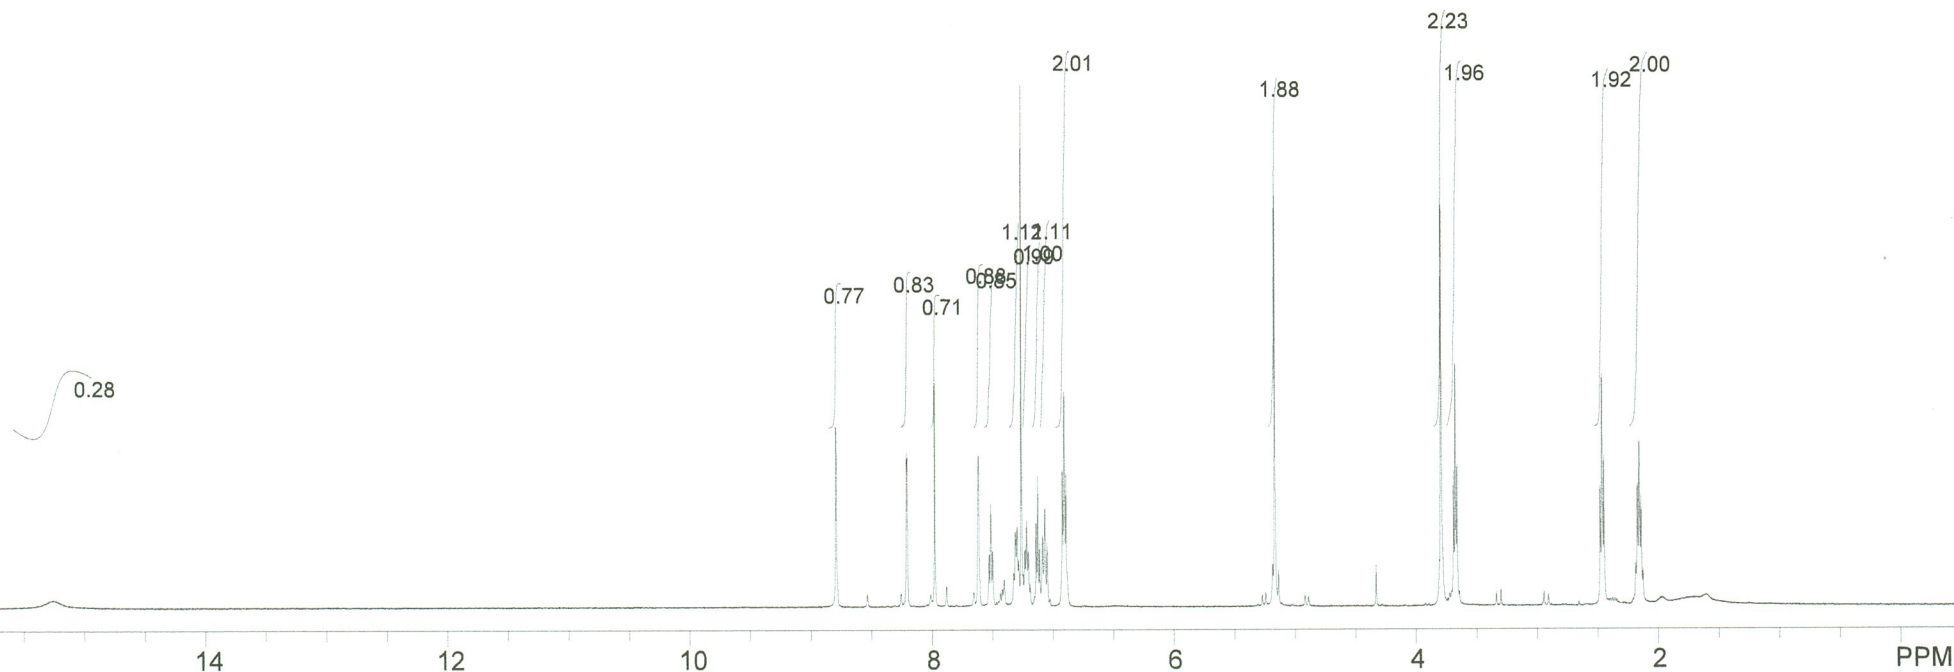

196-amide

USER: -- DATE: May 4 2011

F1: 499.782

F2: 125.682

SW1: 12494

OF1: 2979.5

PTS1d: 32768

EX: s2pul

PW: 6.5 usec

PD: 1.0 sec

NA: 32

LB: 0.2

Nuts - 1H

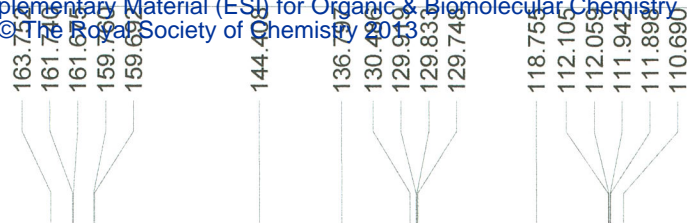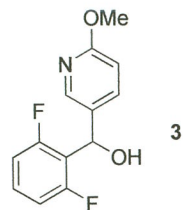

(2,6-difluorophenyl)(6-methoxypyridin-3-yl)methanol

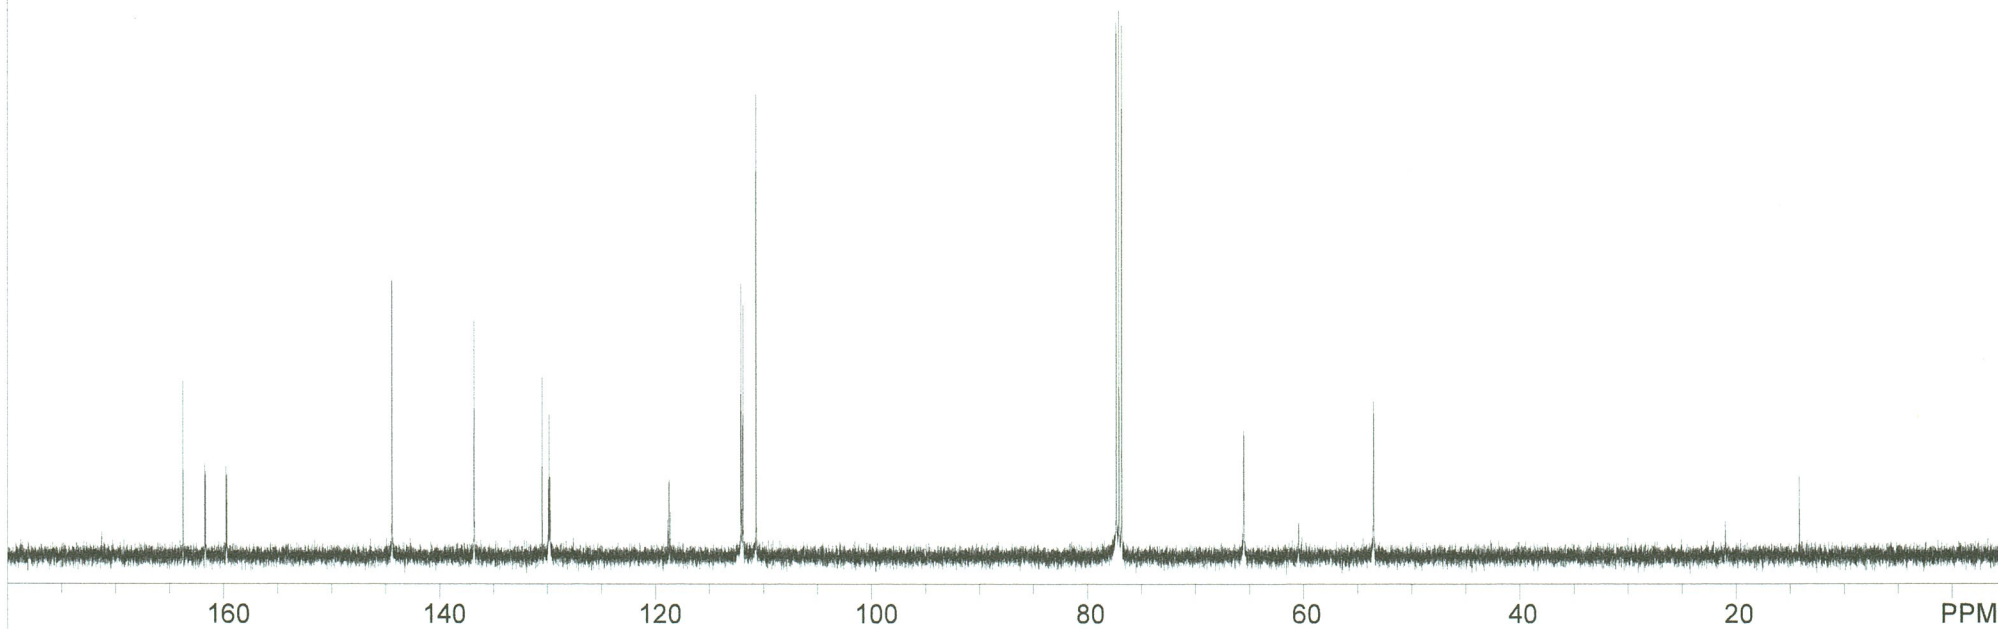

MAN\_VI\_14C3

USER: -- DATE: Mar 31 2010

F1: 125.683

F2: 499.782

SW1: 31422

OF1: 13823.6

PTS1d: 65536

EX: s2pul

PW: 7.4 usec

PD: 2.0 sec

NA: 256

LB: 0.2

Nuts - \$CARBON\_01.fid

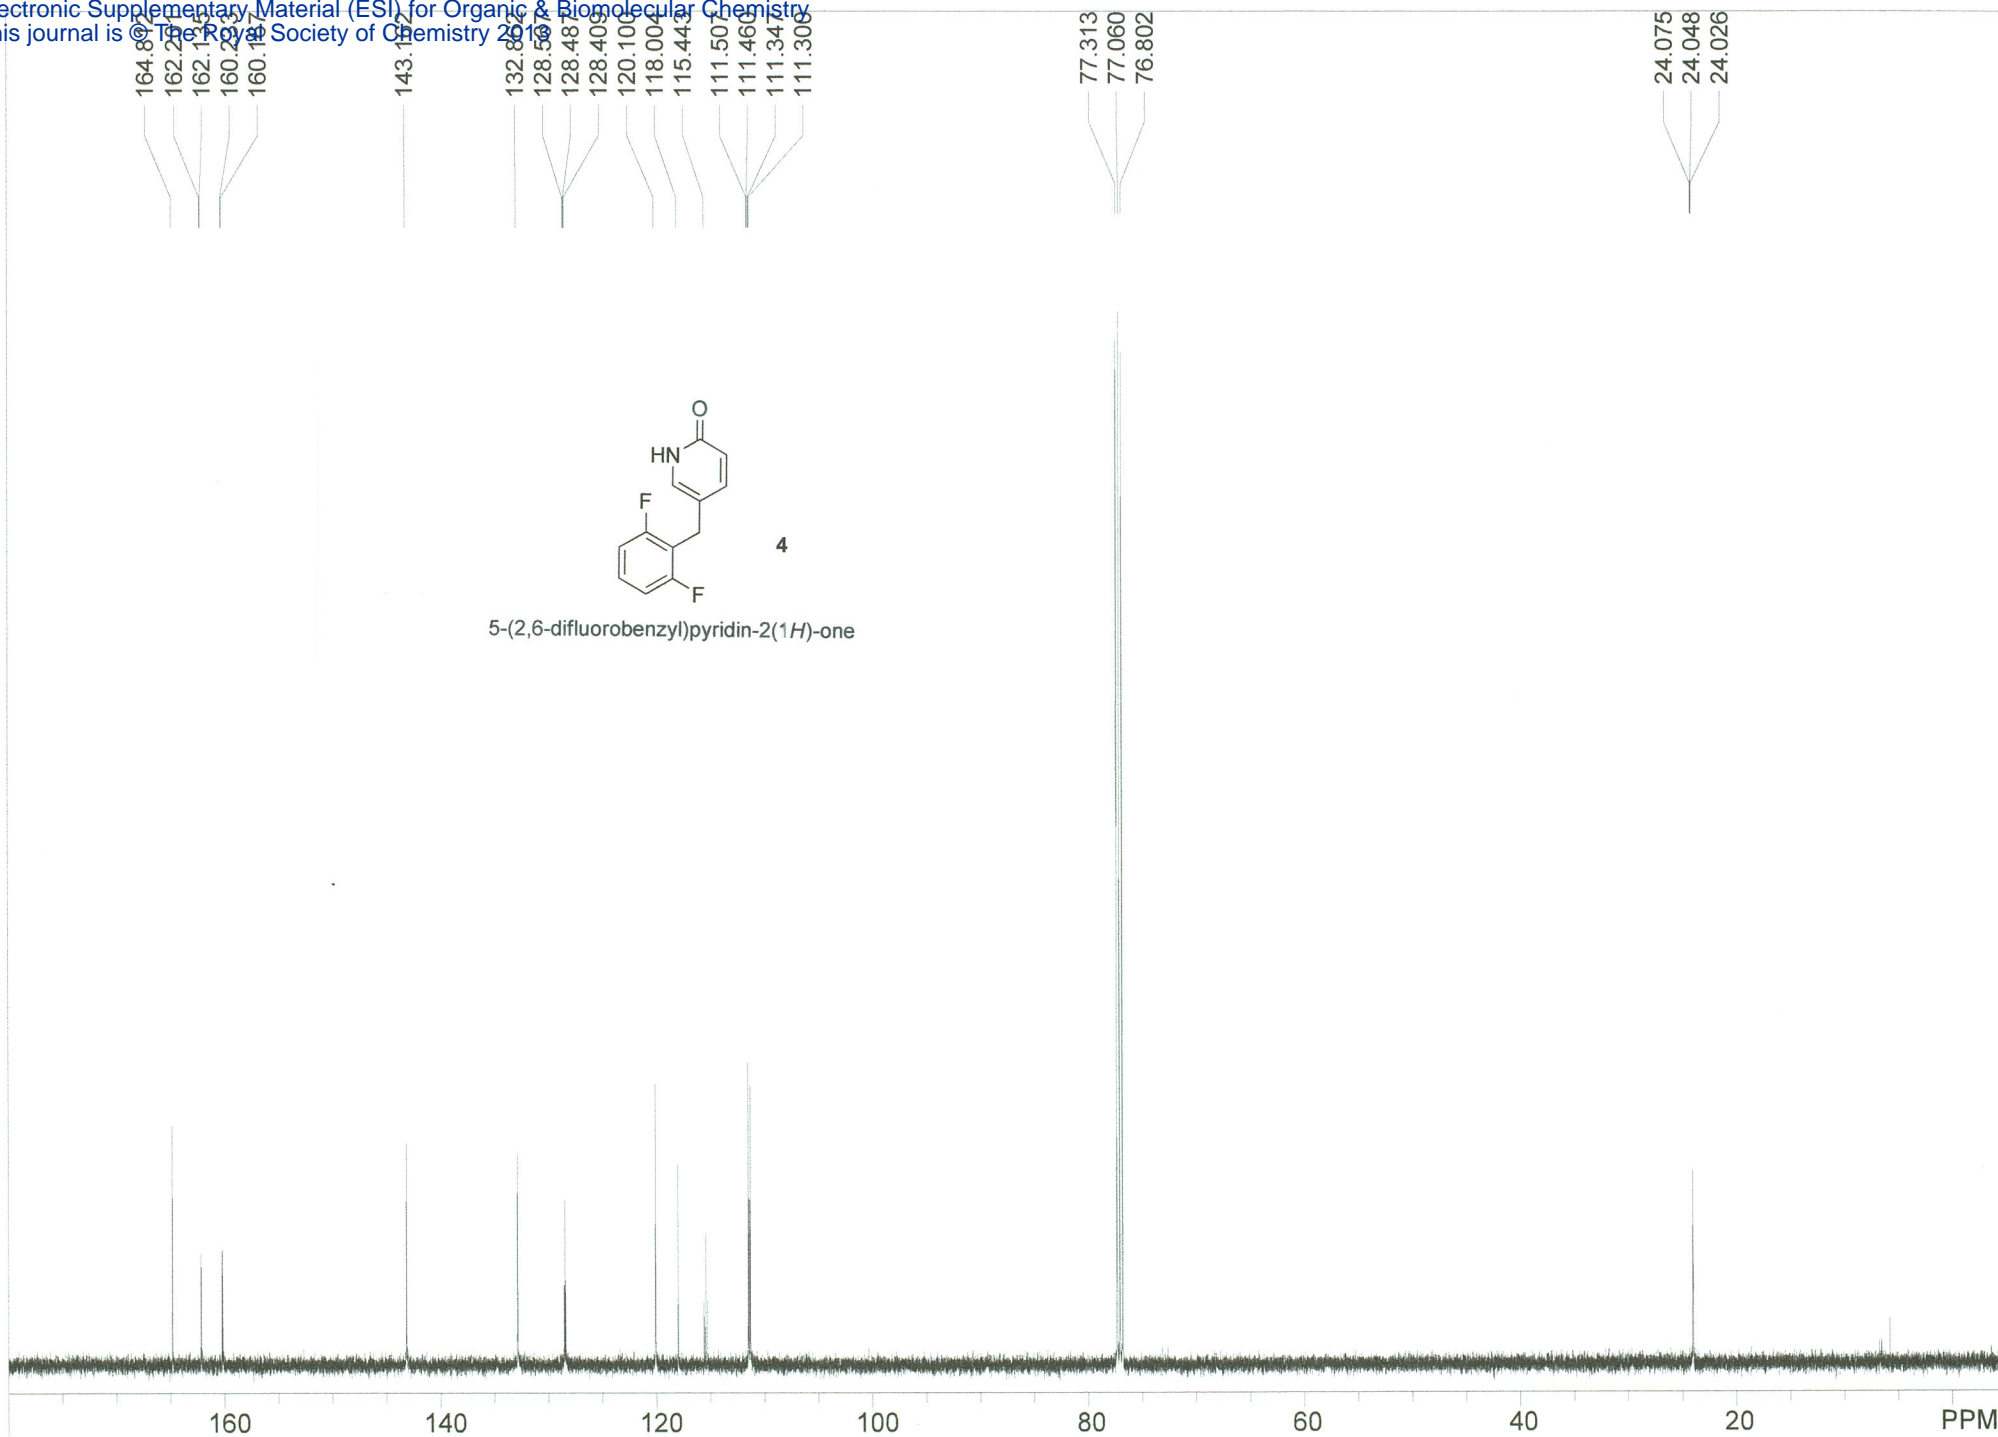

MAN\_VI\_16C 4

USER: -- DATE: Apr 2 2010

|             |              |             |              |              |
|-------------|--------------|-------------|--------------|--------------|
| F1: 125.683 | F2: 499.782  | SW1: 31422  | OF1: 13823.6 | PTS1d: 65536 |
| EX: s2pul   | PW: 7.4 usec | PD: 2.0 sec | NA: 256      | LB: 0.2      |
| Nuts - 4C   |              |             |              |              |



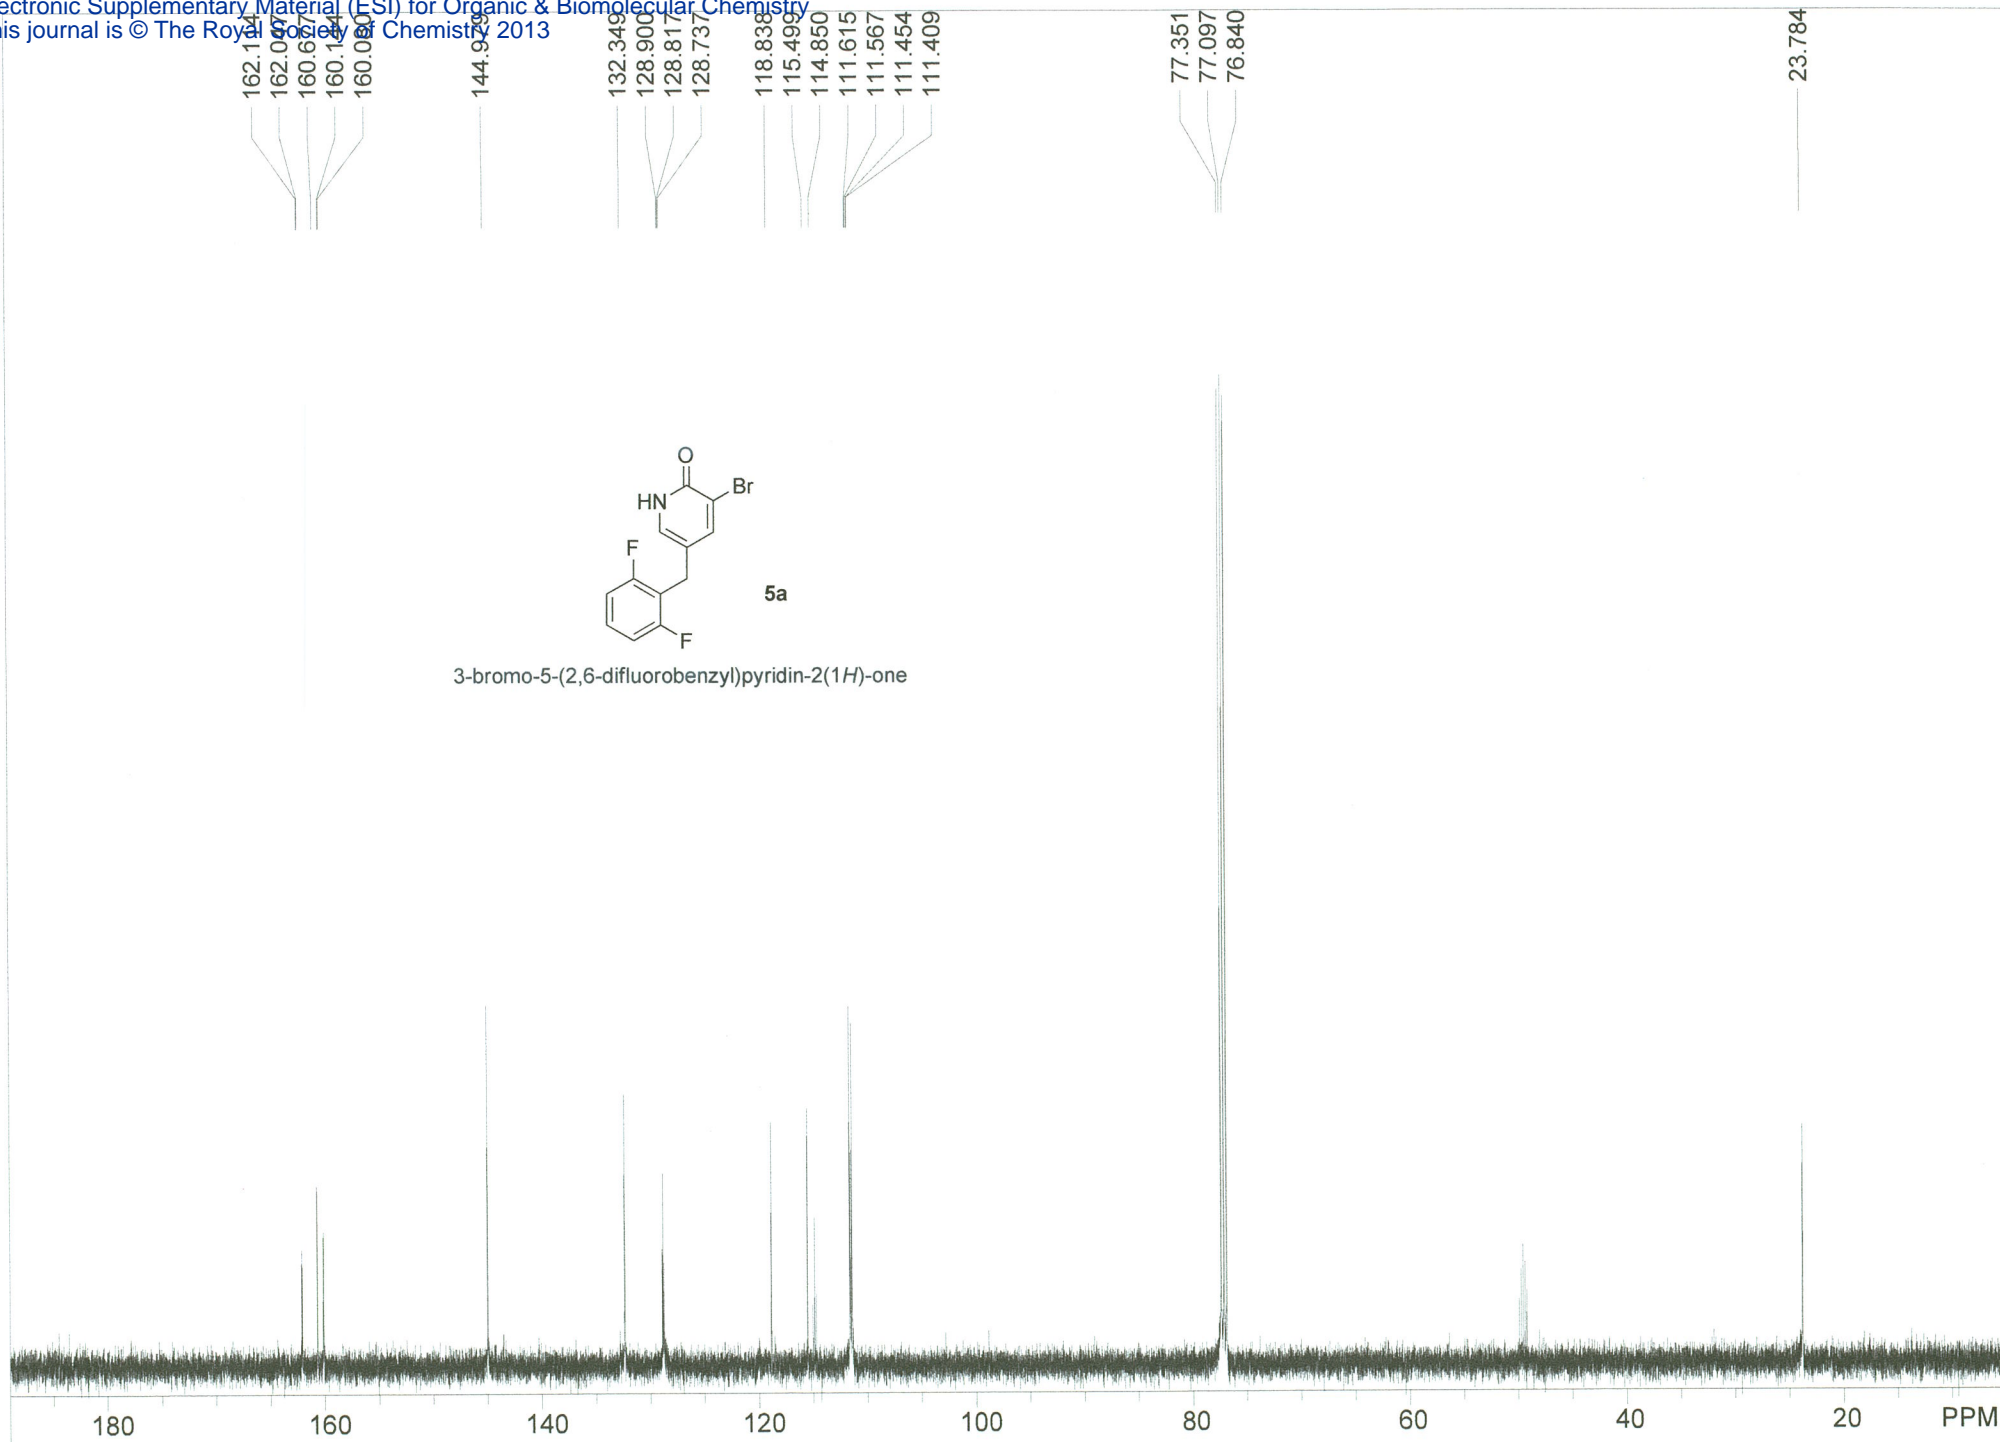

MAN\_VI\_18C5aC

USER: -- DATE: Apr 5 2010

F1: 125.683

F2: 499.782

SW1: 31422

OF1: 13823.6

PTS1d: 65536

EX: s2pul

PW: 7.4 usec

PD: 2.0 sec

NA: 256

LB: 0.2

Nuts - \$CARBON\_01.fid

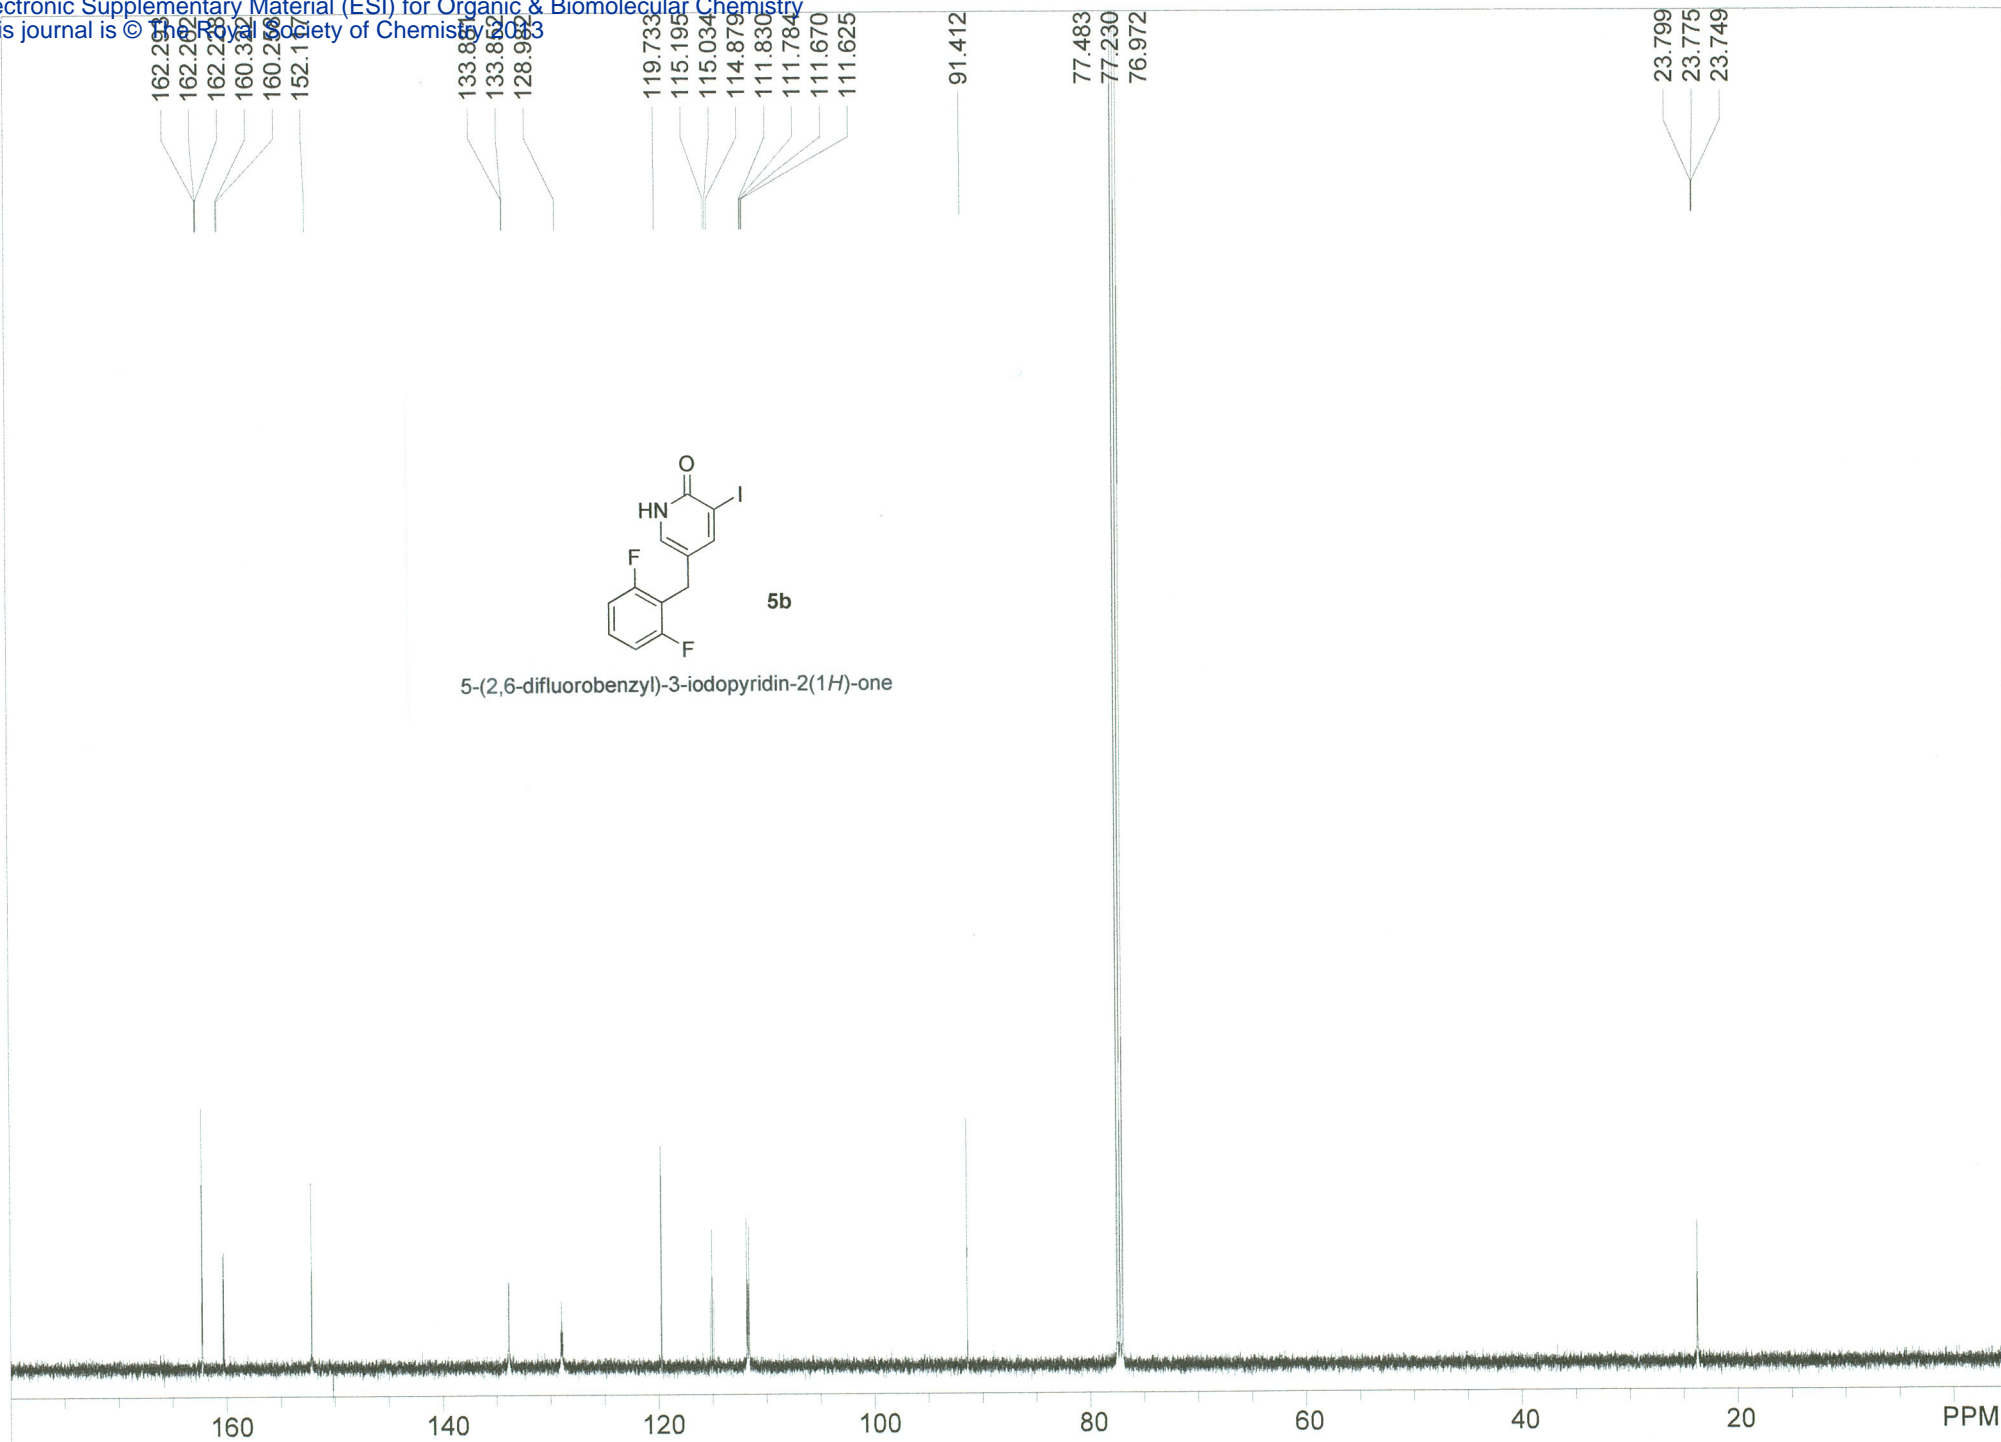

5-(2,6-difluorobenzyl)-3-iodopyridin-2(1H)-one 5bC

USER: -- DATE: May 6 2011

F1: 125.683

F2: 499.782

SW1: 31422

OF1: 13843.6

PTS1d: 65536

EX: s2pul

PW: 7.4 usec

PD: 1.0 sec

NA: 1280

LB: 0.2

Nuts - 5bC



162.162  
160.160  
158.338  
142.756  
135.446  
132.085  
132.066  
130.330  
130.268  
128.766  
124.618  
124.594  
117.087  
116.913  
115.503  
115.330  
111.622  
111.576  
111.462  
111.416

77.313  
77.060  
76.802

48.077  
48.053

24.057  
24.032

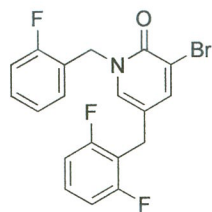

6

3-bromo-5-(2,6-difluorobenzyl)-1-(2-fluorobenzyl)pyridin-2(1H)-one

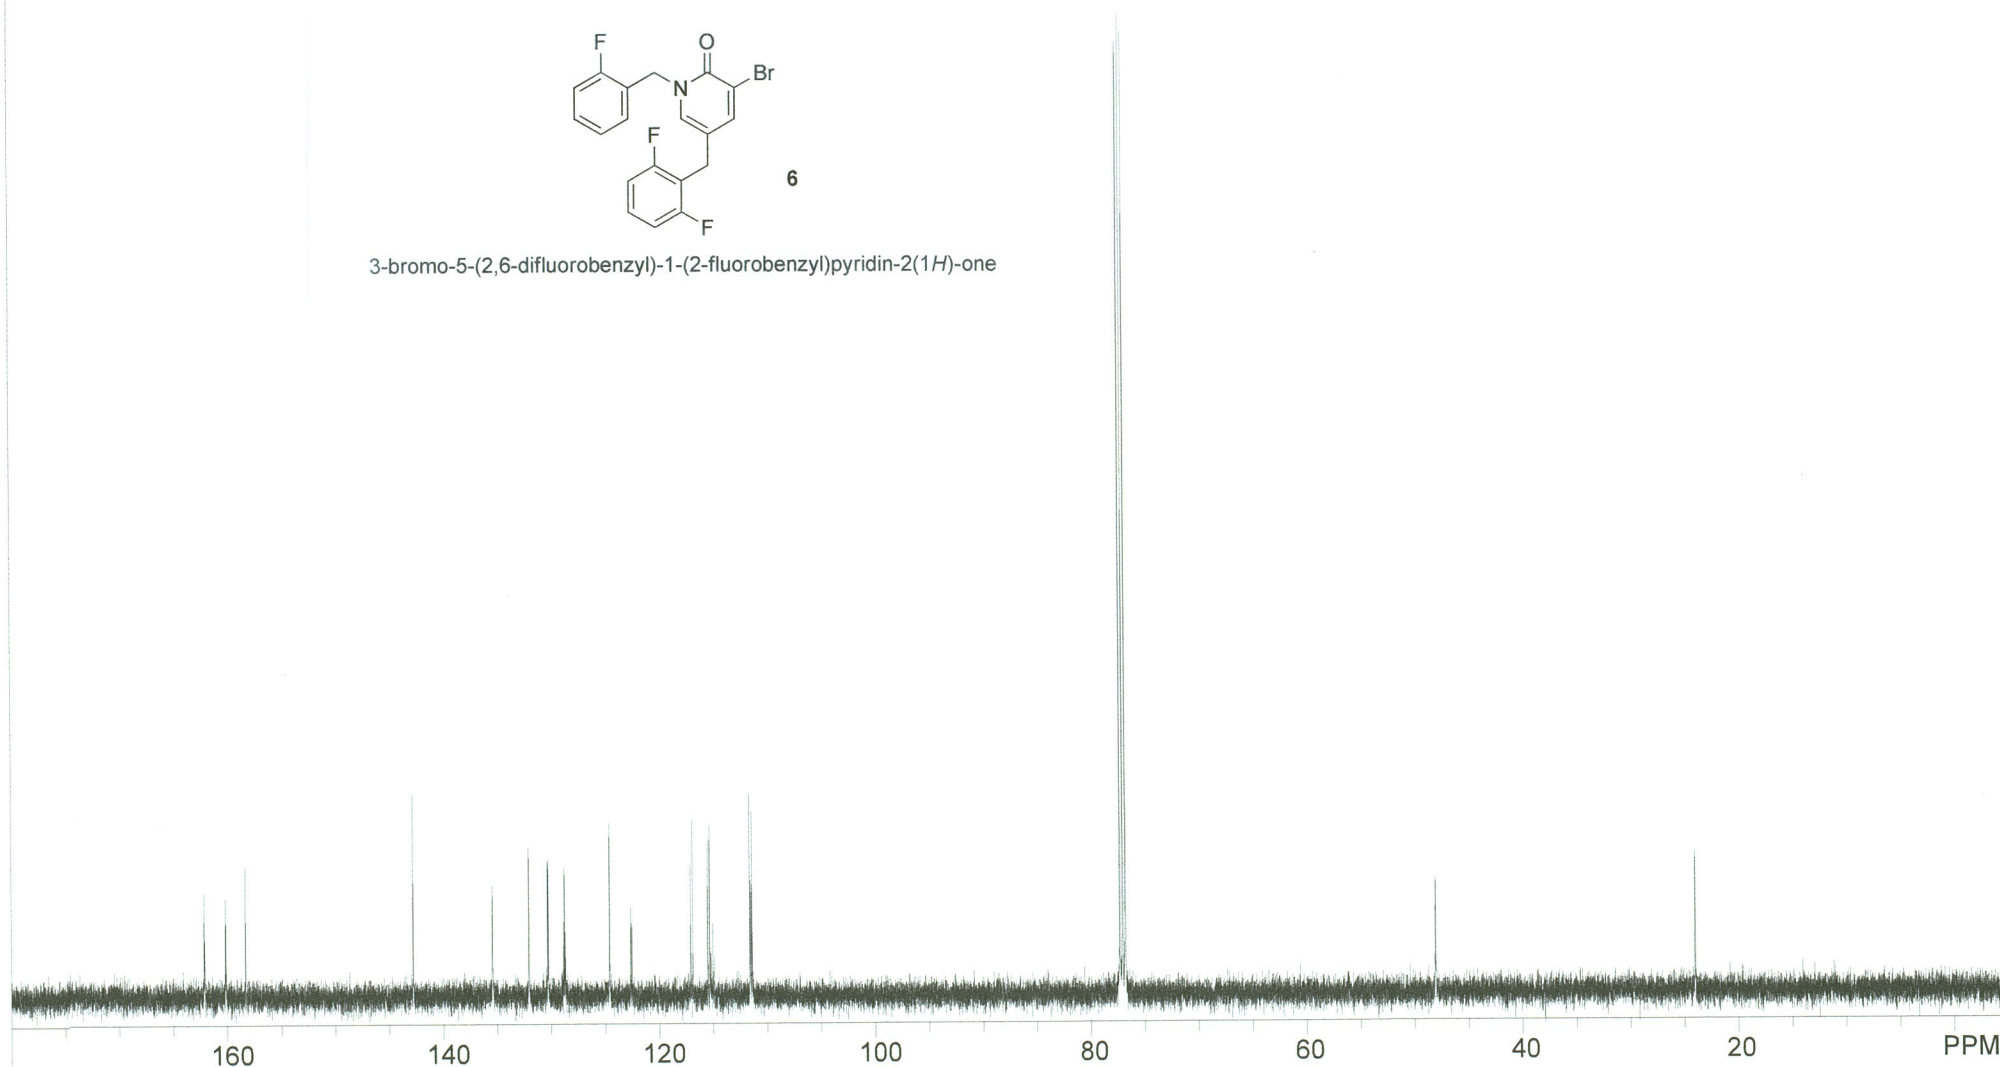

MAN\_VI\_20C 6C

USER: -- DATE: Apr 6 2010

F1: 125.683

F2: 499.782

SW1: 31422

OF1: 13823.6

PTS1d: 65536

EX: s2pul

PW: 7.4 usec

PD: 2.0 sec

NA: 256

LB: 0.2

Nuts - \$CARBON\_01.fid

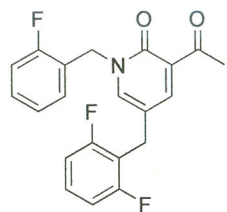

3-acetyl-5-(2,6-difluorobenzyl)-1-(2-fluorobenzyl)pyridin-2(1*H*)-one

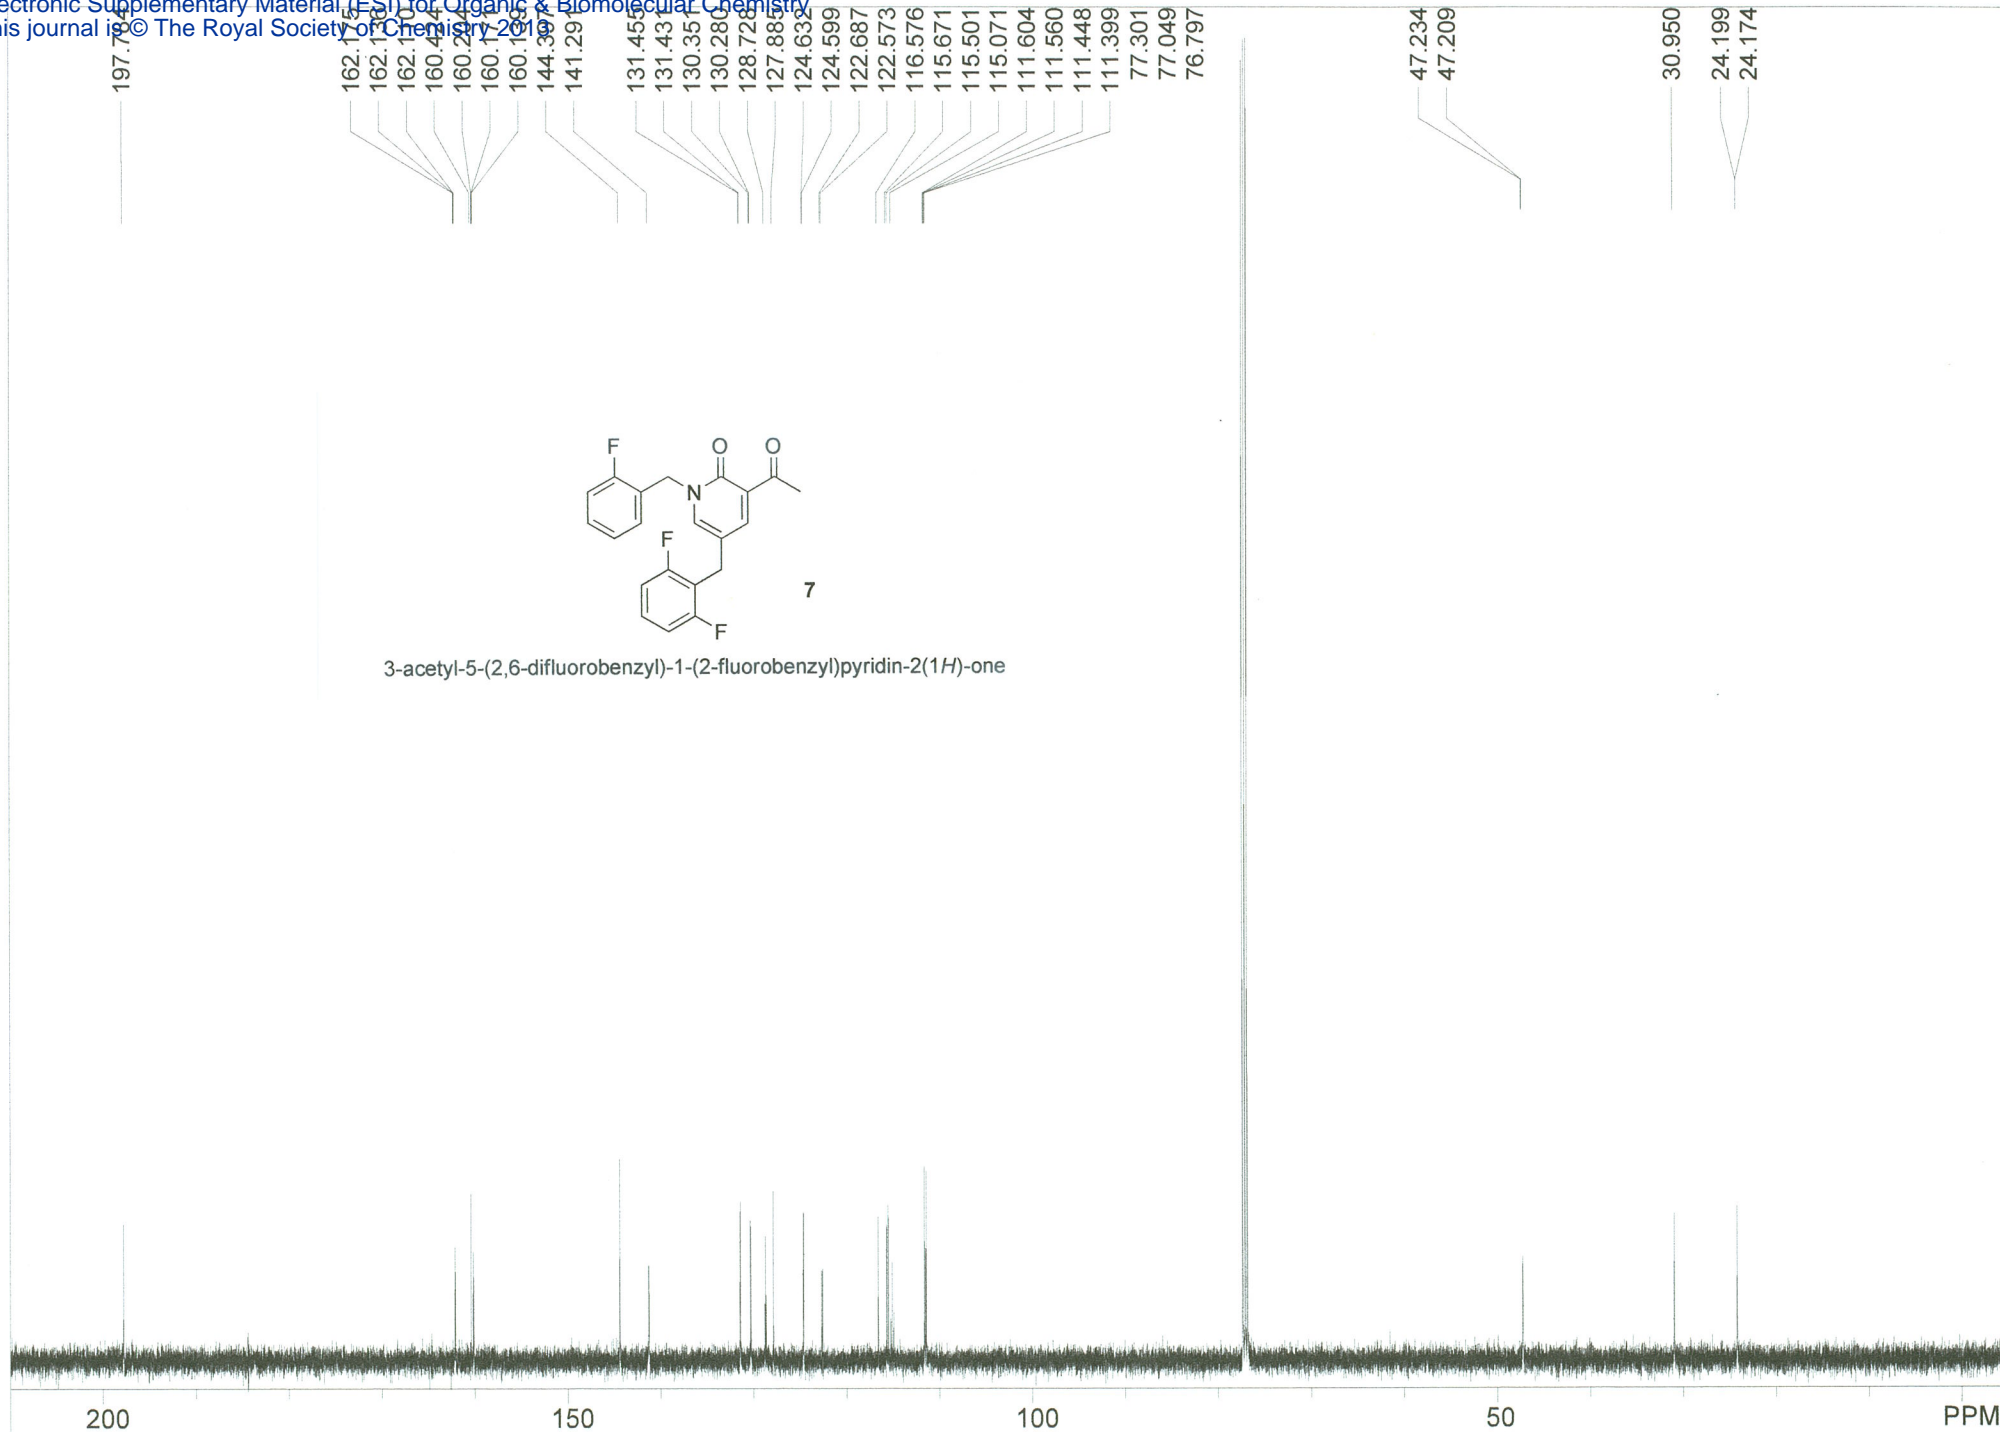

MAN\_VI\_22C 7C

USER: -- DATE: Apr 8 2010

F1: 125.683

F2: 499.782

SW1: 31422

OF1: 13823.6

PTS1d: 65536

EX: s2pul

PW: 7.4 usec

PD: 2.0 sec

NA: 256

LB: 0.2

Nuts - \$CARBON\_01.fid

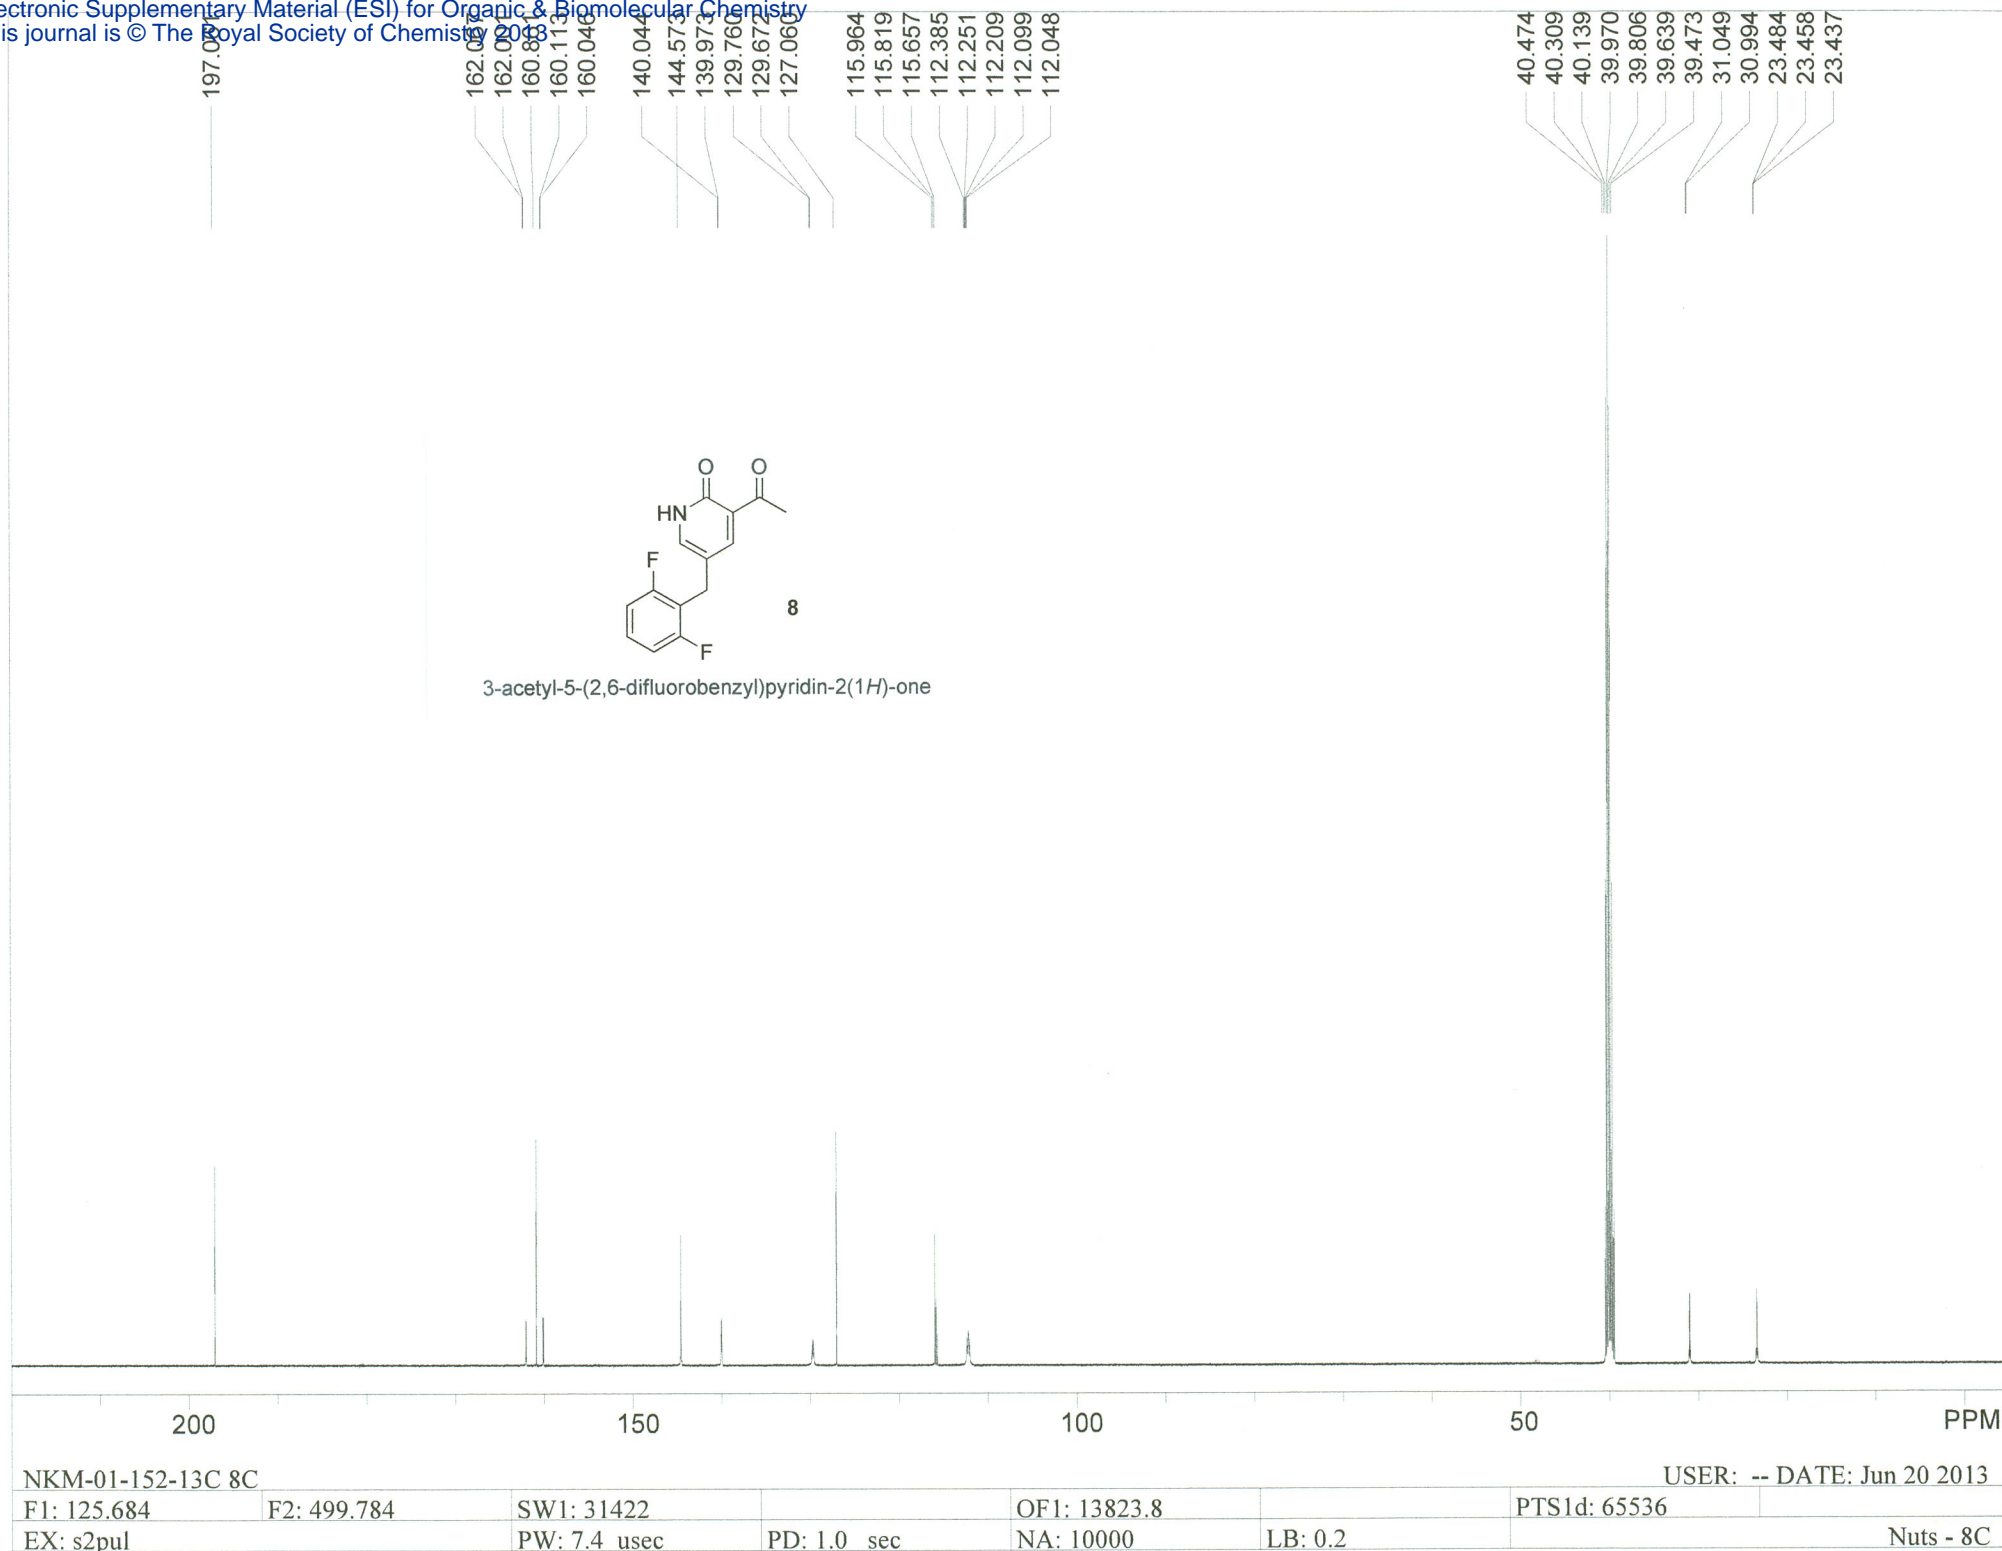

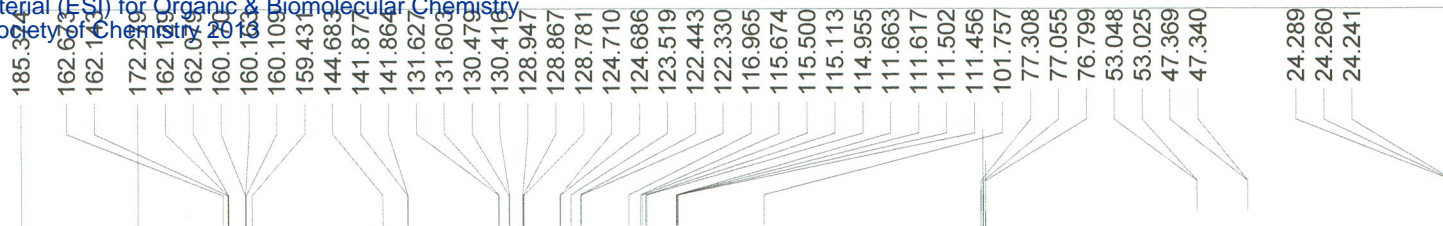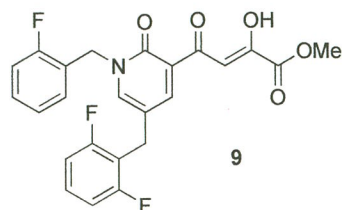

Methyl 4-(5-(2,6-difluorobenzyl)-1-(2-fluorobenzyl)-2-oxo-1,2-dihydropyridin-3-yl)-  
2-hydroxy-4-oxobut-2-enoate

200 150 100 50 PPM

MAN\_VI\_24C 9C

USER: -- DATE: Apr 12 2010

F1: 125.683

F2: 499.782

SW1: 31422

OF1: 13823.6

PTS1d: 65536

EX: s2pul

PW: 7.4 usec

PD: 2.0 sec

NA: 1000

LB: 0.2

Nuts - \$CARBON\_01.fid

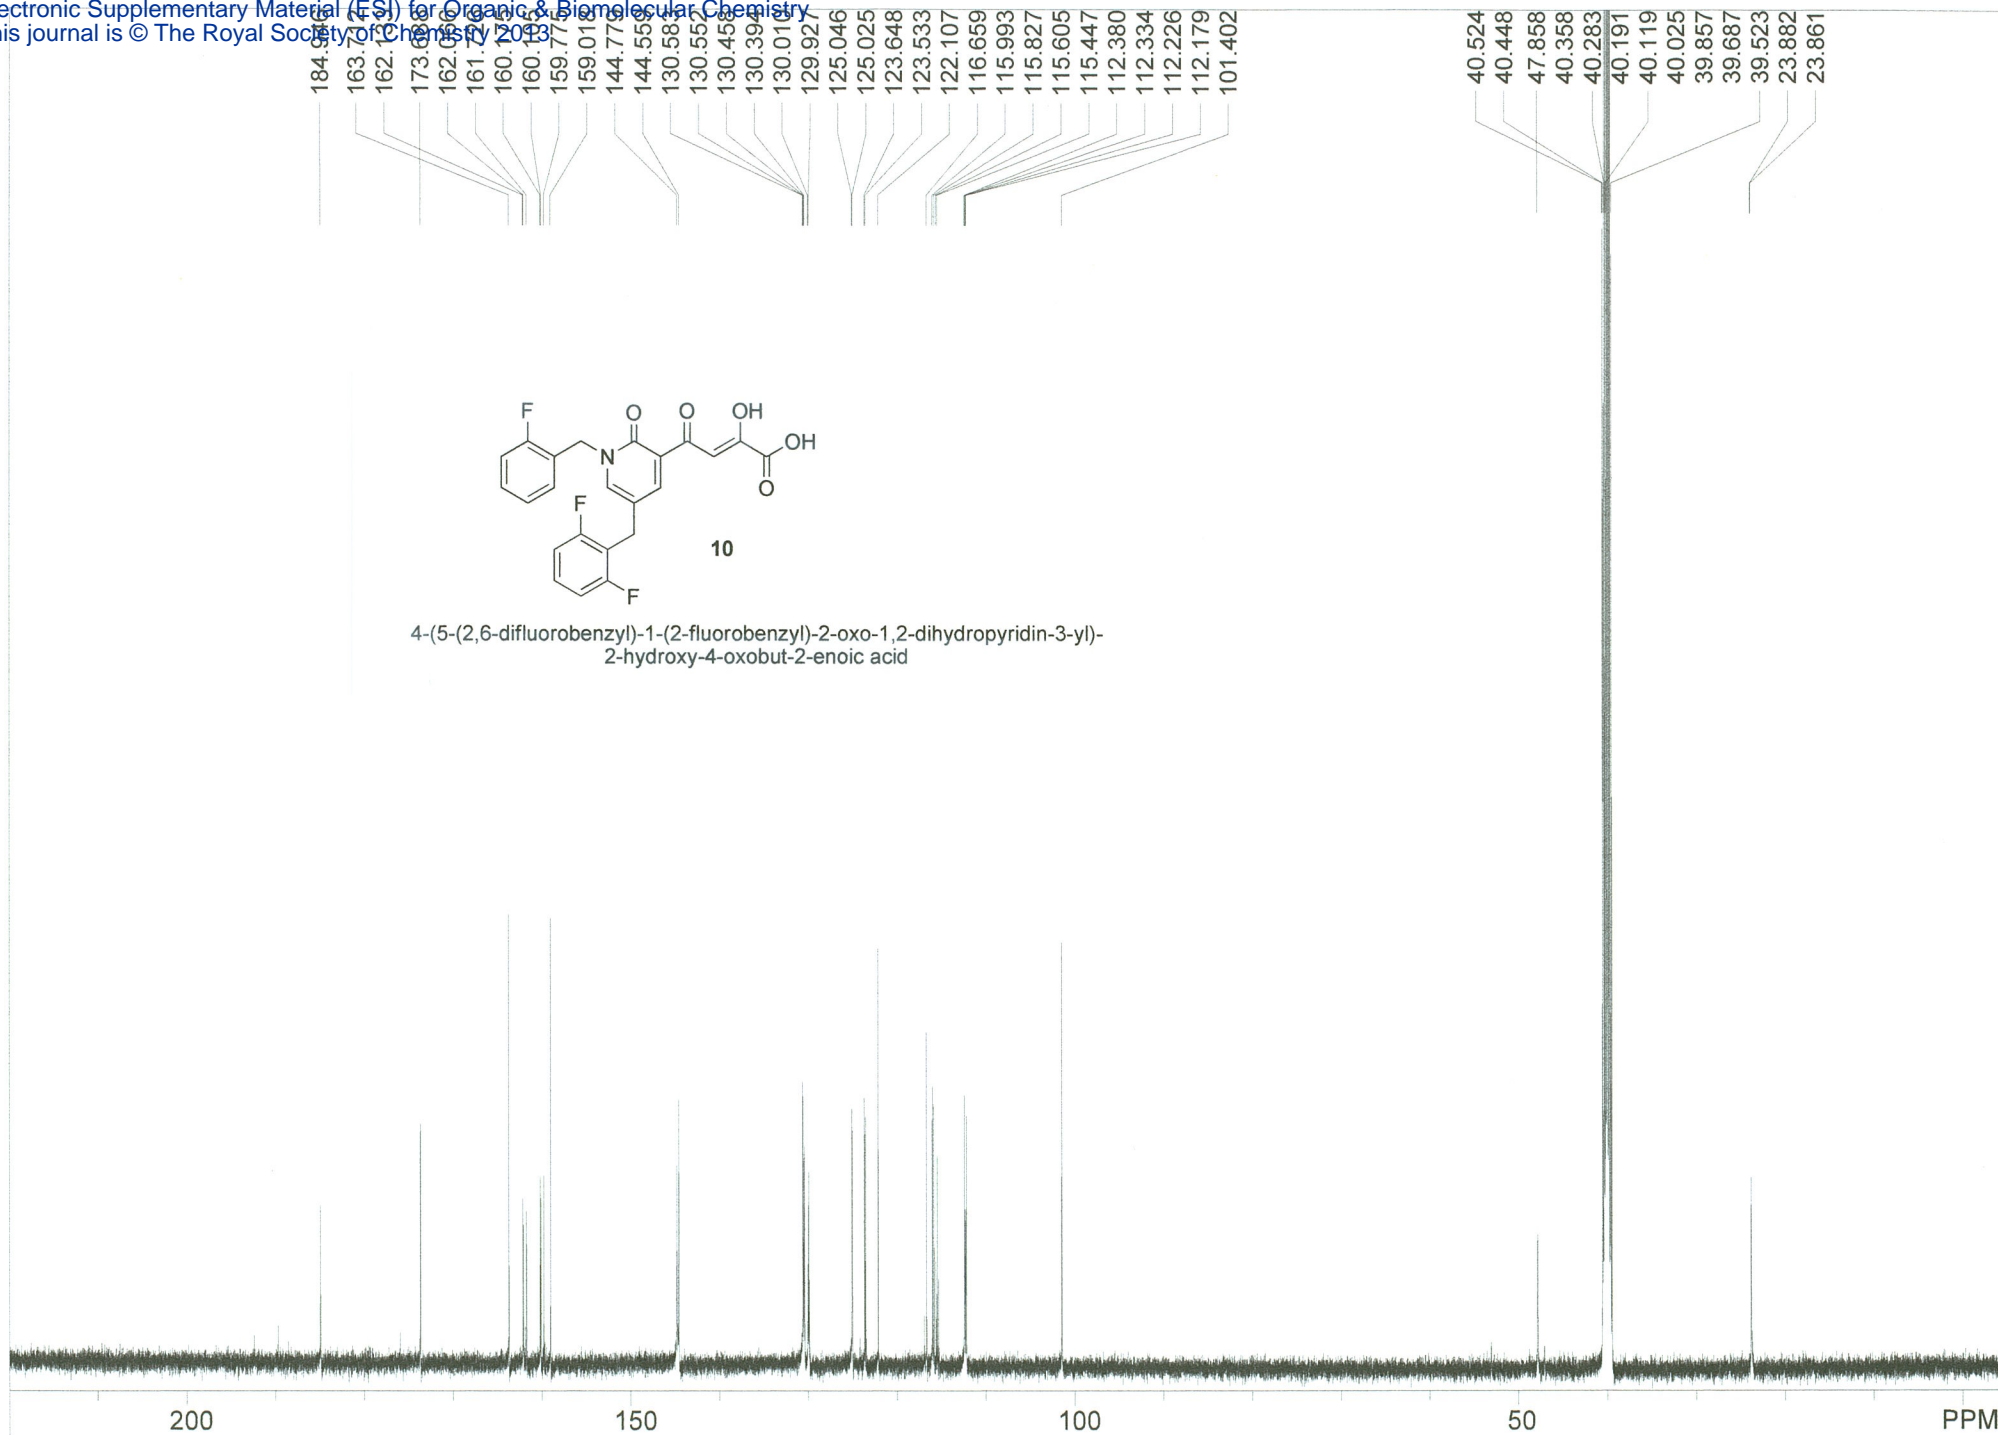

MAN\_VI\_26C 10C

USER: -- DATE: Apr 14 2010

F1: 125.684

F2: 499.784

SW1: 31422

OF1: 13823.8

PTS1d: 65536

EX: s2pul

PW: 7.4 usec

PD: 2.0 sec

NA: 5000

LB: 0.2

Nuts - \$CARBON\_01.fid



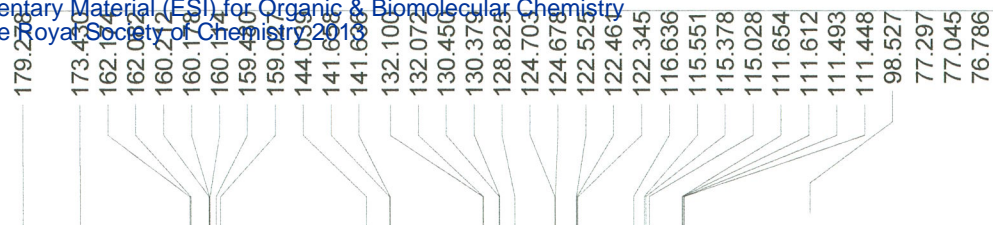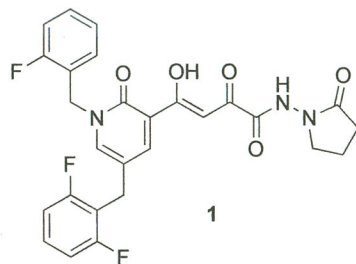

4-(5-(2,6-difluorobenzyl)-1-(2-fluorobenzyl)-2-oxo-1,2-dihydropyridin-3-yl)-  
4-hydroxy-2-oxo-*N*-(2-oxopyrrolidin-1-yl)but-3-enamide

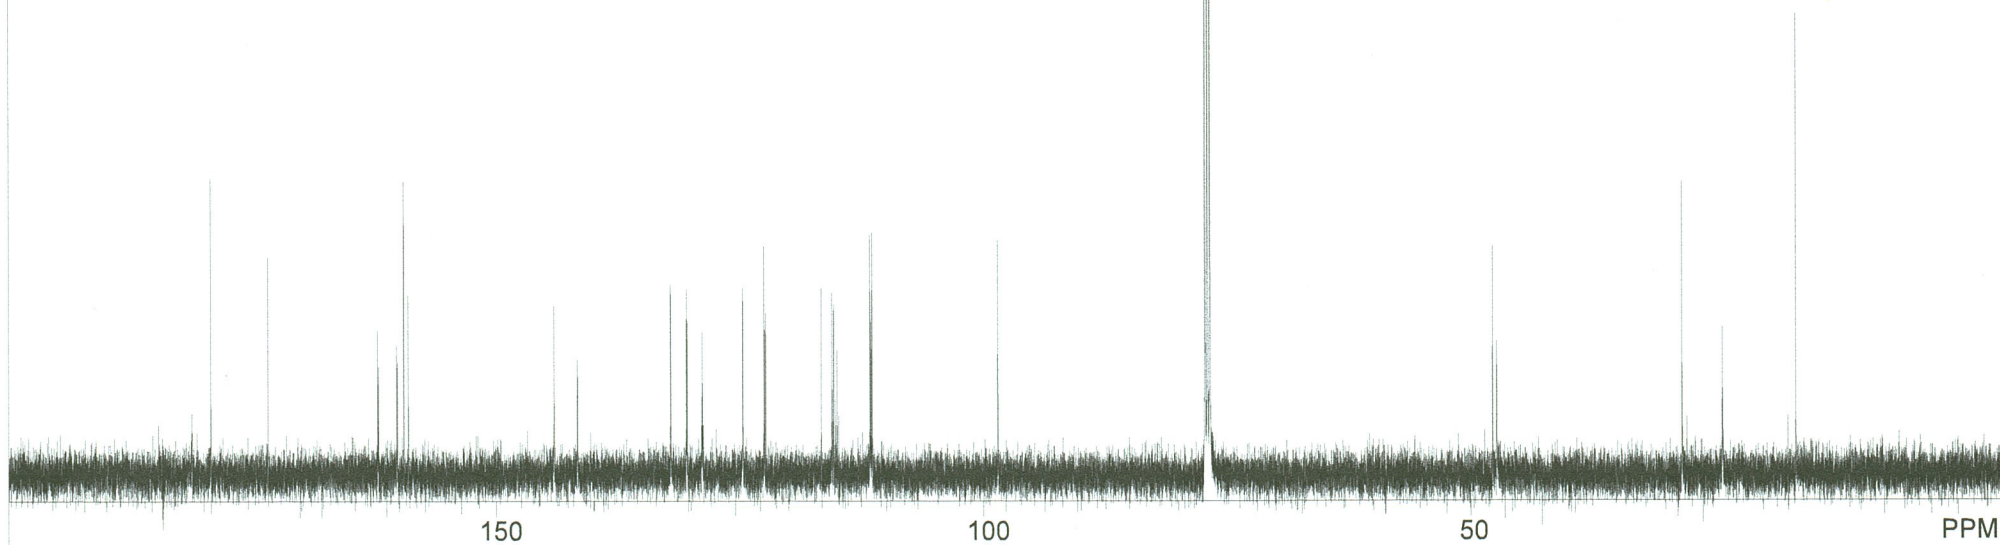

MAN\_VI\_30HC 1C

USER: -- DATE: Apr 19 2010

|             |              |             |              |              |
|-------------|--------------|-------------|--------------|--------------|
| F1: 125.683 | F2: 499.782  | SW1: 31422  | OF1: 13823.6 | PTS1d: 65536 |
| EX: s2pul   | PW: 7.4 usec | PD: 2.0 sec | NA: 1200     | LB: 0.2      |
| Nuts - 1C   |              |             |              |              |

## HPLC Chromatogram of Target Molecule 1 and Analysis Table for Purity

Analysis was done by reversed-phase HPLC on an analytical Delta Pak C18 column with a mobile phase of (A) 10 mM potassium phosphate buffer (pH 6.5) and (B) acetonitrile: 0-2 min, 30 % B, 2- 8 min, 30-60 % B, 8- 18 min, 60 % B. The flow rate was 1.5 mL/min, with UV detection at 360 nm. The retention time for compound **1** was 9.73 min and the purity was 99.61 %.

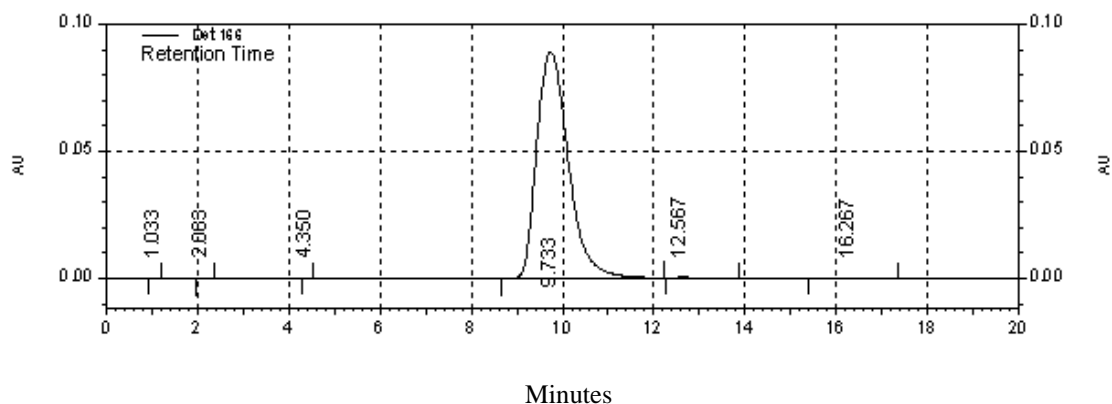

| Time   | Area    | Area % | Height | Height % |
|--------|---------|--------|--------|----------|
| 1.033  | 401     | 0.01   | 48     | 0.05     |
| 2.083  | 1363    | 0.03   | 121    | 0.13     |
| 4.350  | 275     | 0.01   | 31     | 0.03     |
| 9.733  | 4296146 | 99.61  | 89112  | 99.36    |
| 12.567 | 8878    | 0.21   | 252    | 0.28     |
| 16.267 | 5695    | 0.13   | 118    | 0.13     |
